# Supplementary material for: New particle formation from the reactions of ozone with indene and styrene
Source: Royal Society of Chemistry journal article supplement (doi:10.1039/c9cp00912d), 2019-01-01
Supplement: c9cp00912d1.pdf [file c9cp00912d1.pdf]

### New particle formation from the reactions of ozone with indene and styrene.

Larisa L.B. Bracco<sup>a</sup>, María E. Tucceri<sup>a</sup>, Alba Escalona<sup>b</sup>, Yolanda Díaz de Mera<sup>b</sup>, Alfonso Aranda<sup>b\*</sup>, Ana M<sup>a</sup>. Rodríguez<sup>c</sup>, Diana Rodríguez<sup>c</sup>.

#### SUPPLEMENTARY MATERIAL

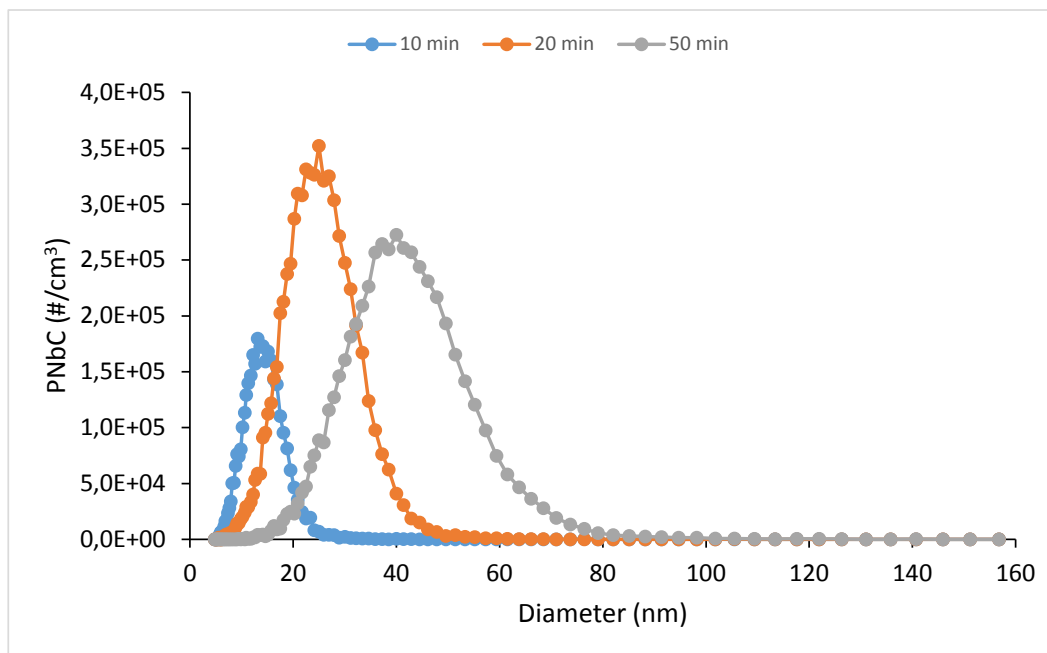

**Fig. S1.** Particle size distributions at different times of reaction. Initial concentrations of reagents: indene and SO<sub>2</sub>: 30ppb. Ozone 60ppb. RH=0.

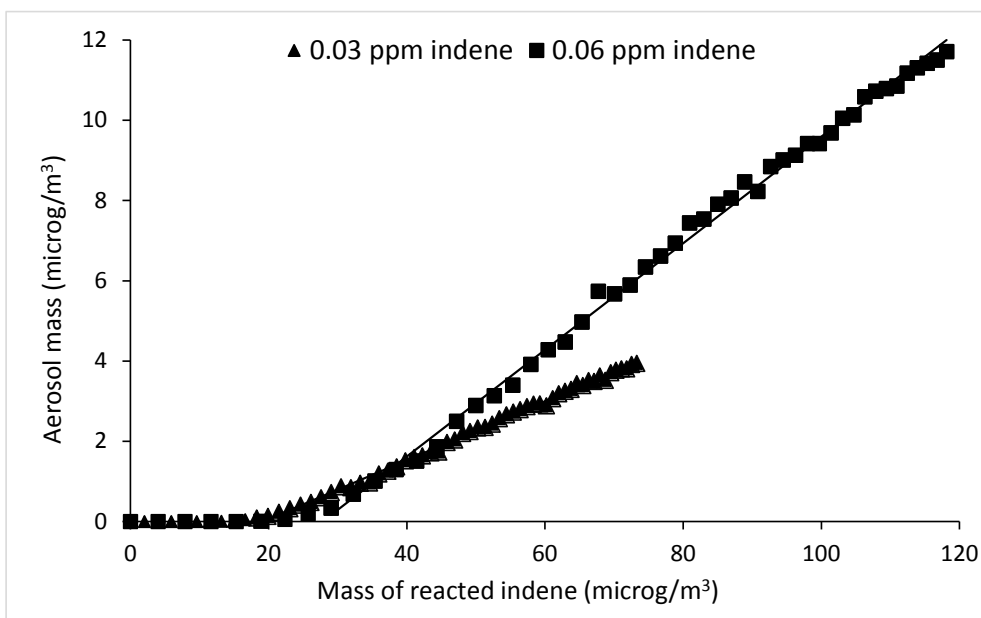

**Fig. S2.** Mass of formed aerosol versus the mass concentration of reacted indene. Initial concentrations of reagents: SO<sub>2</sub> 30ppb, Ozone 60ppb, RH=0.

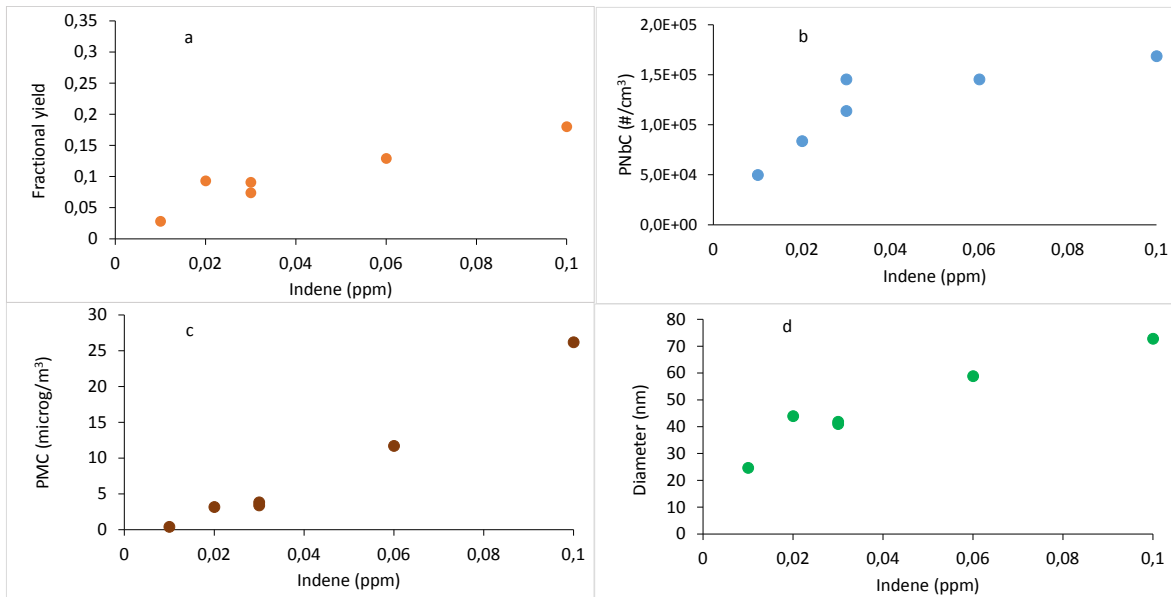

**Fig. S3.** Effect of [indene] on the production of SOA for a series of experiments with initial concentrations of ozone=60ppb and SO<sub>2</sub>=30ppb. RH=0. a) Fractional yield. b) Maximum particle number concentration recorded during the experiment. c) PMC at reaction time =50'. d) Average particle diameter at reaction time =50'.

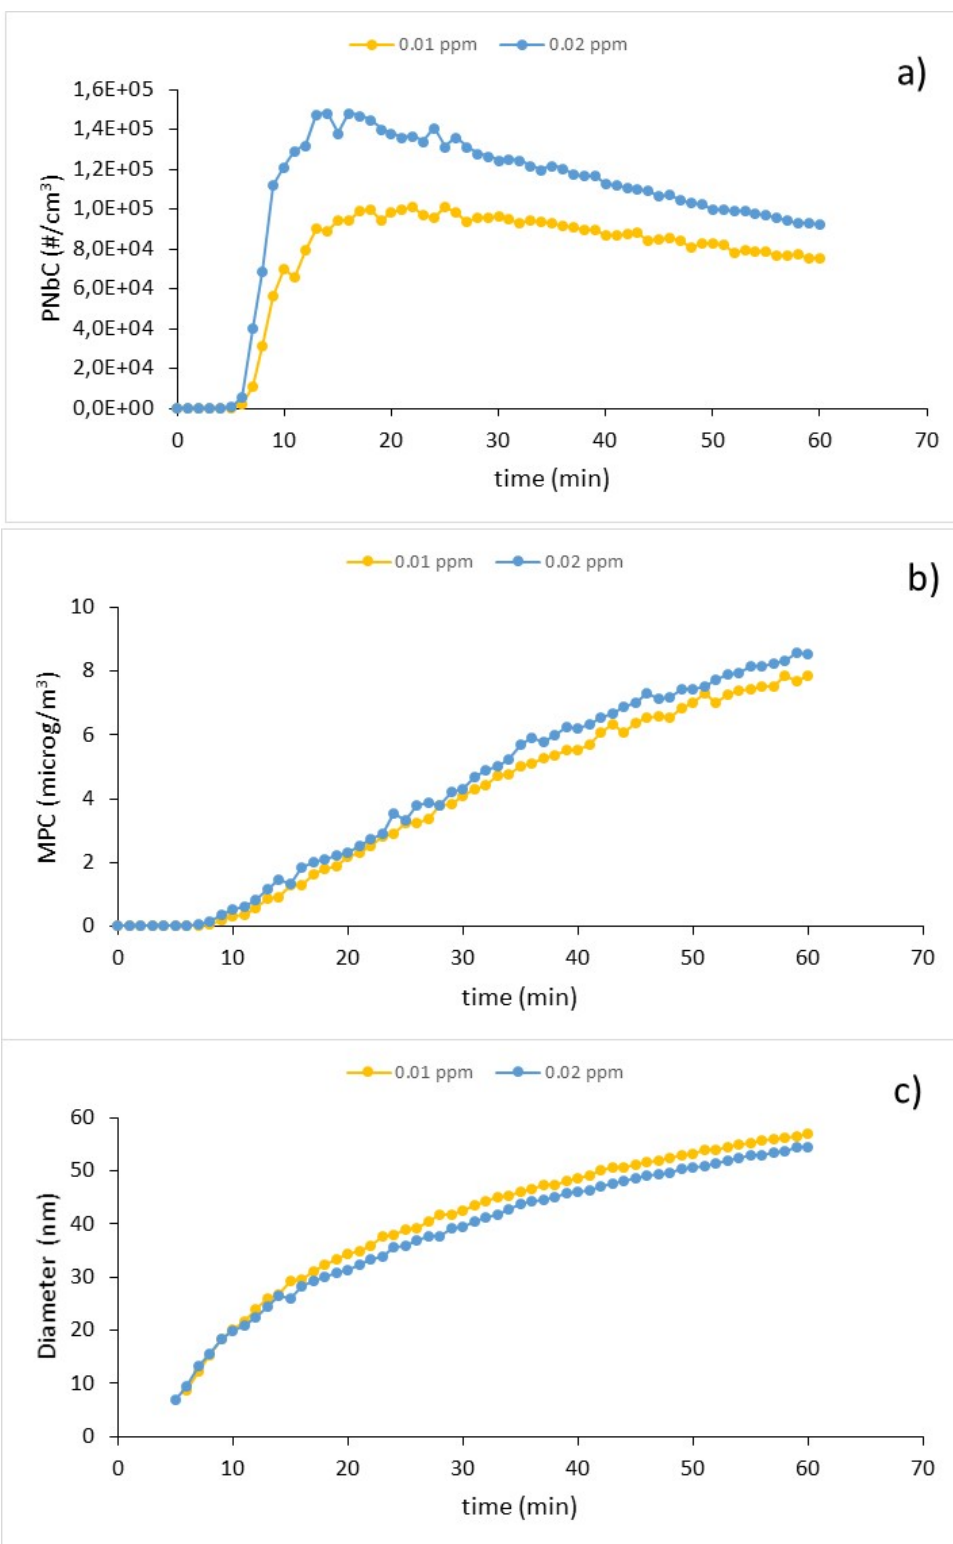

**Fig. S4.** Effect of  $[SO_2]$  on the production of SOA. Time profiles for a) PNbC, b) MPC and c) average particle diameter. For this series of experiments  $[indene]=30$  ppb,  $[ozone]=60$ ppb,  $RH=0$ .

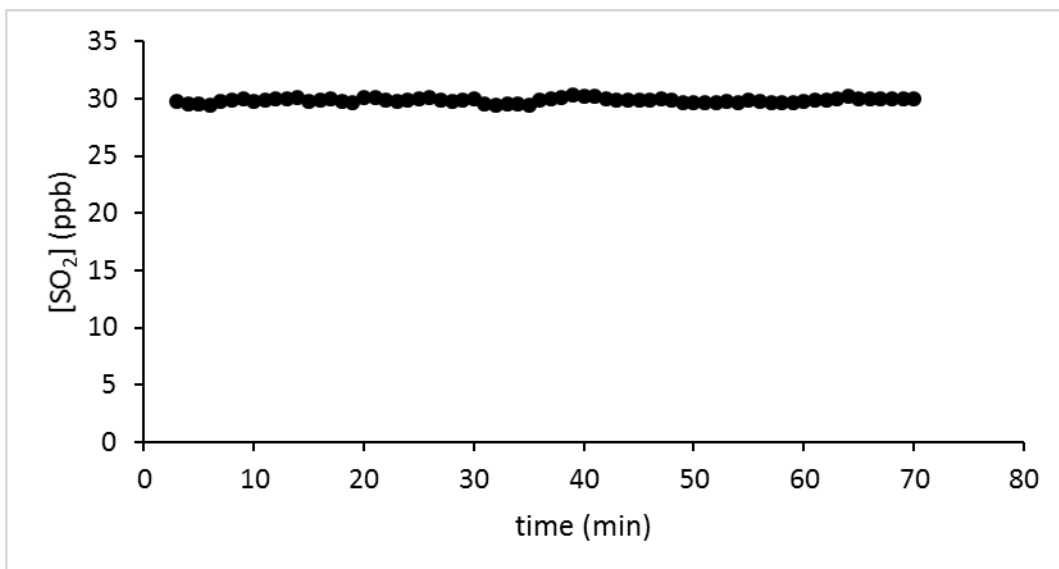

**Fig. S5.** SO<sub>2</sub> profile during ozonolysis reactions of indene. Initial concentrations: [indene]=500 ppb, [Ozone]= 500ppb, RH=0.

a

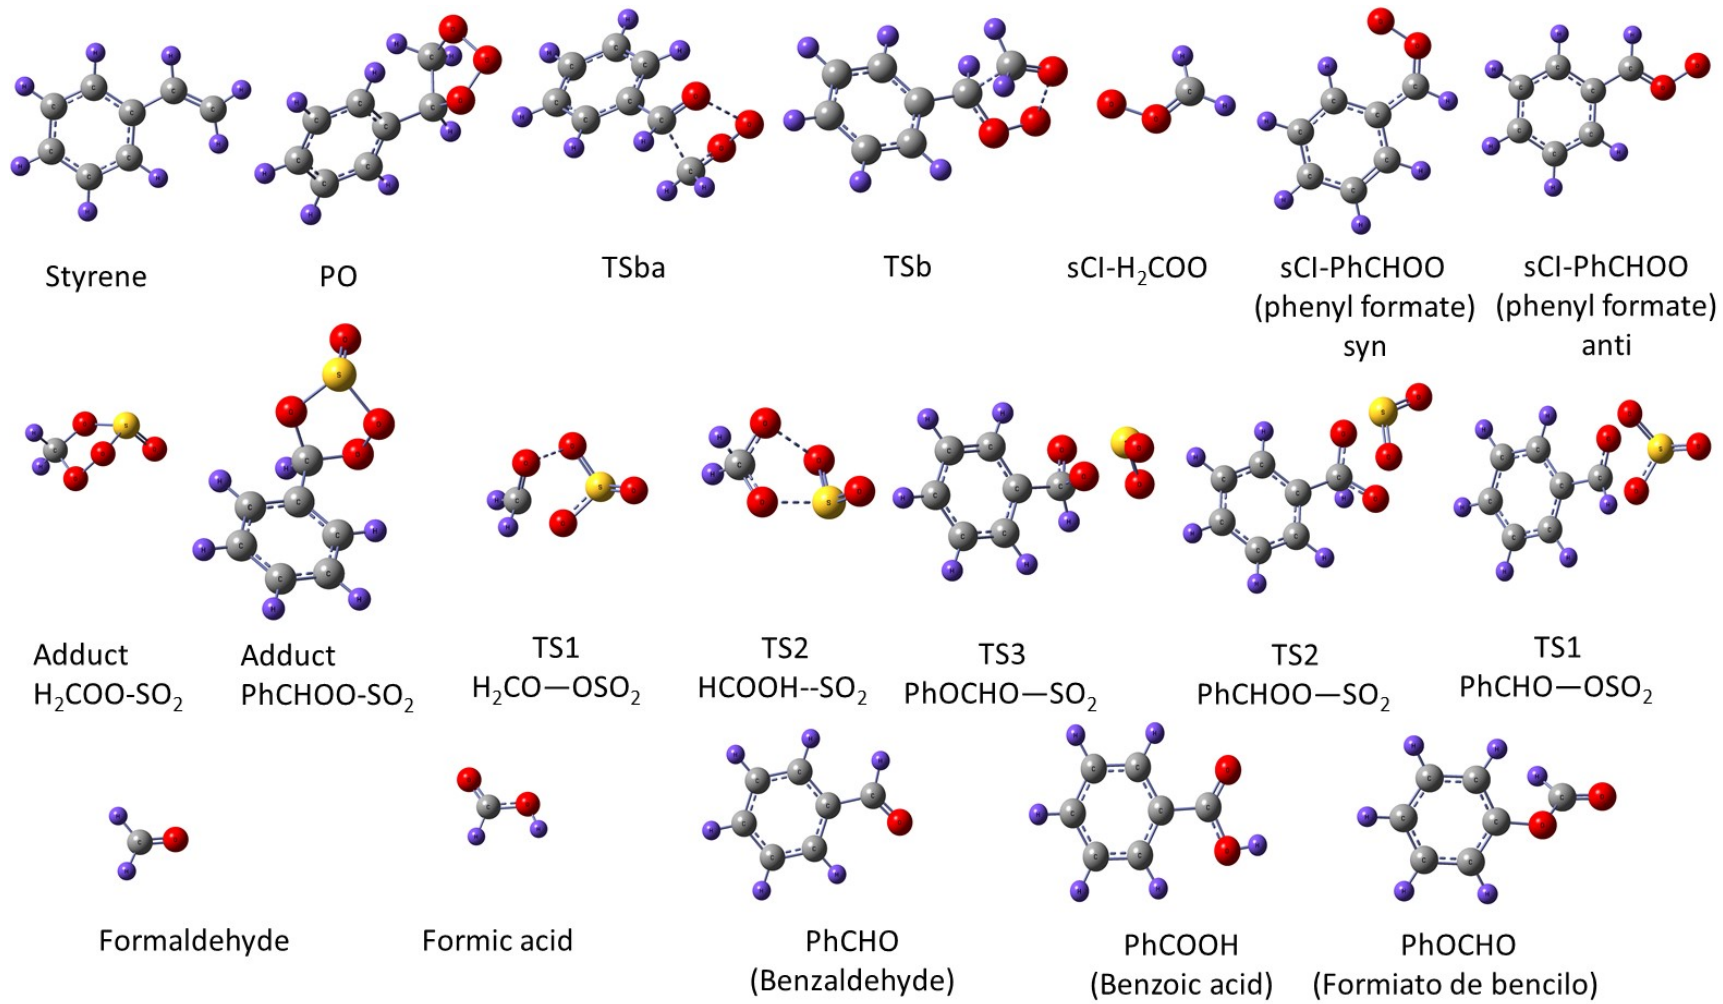

**b**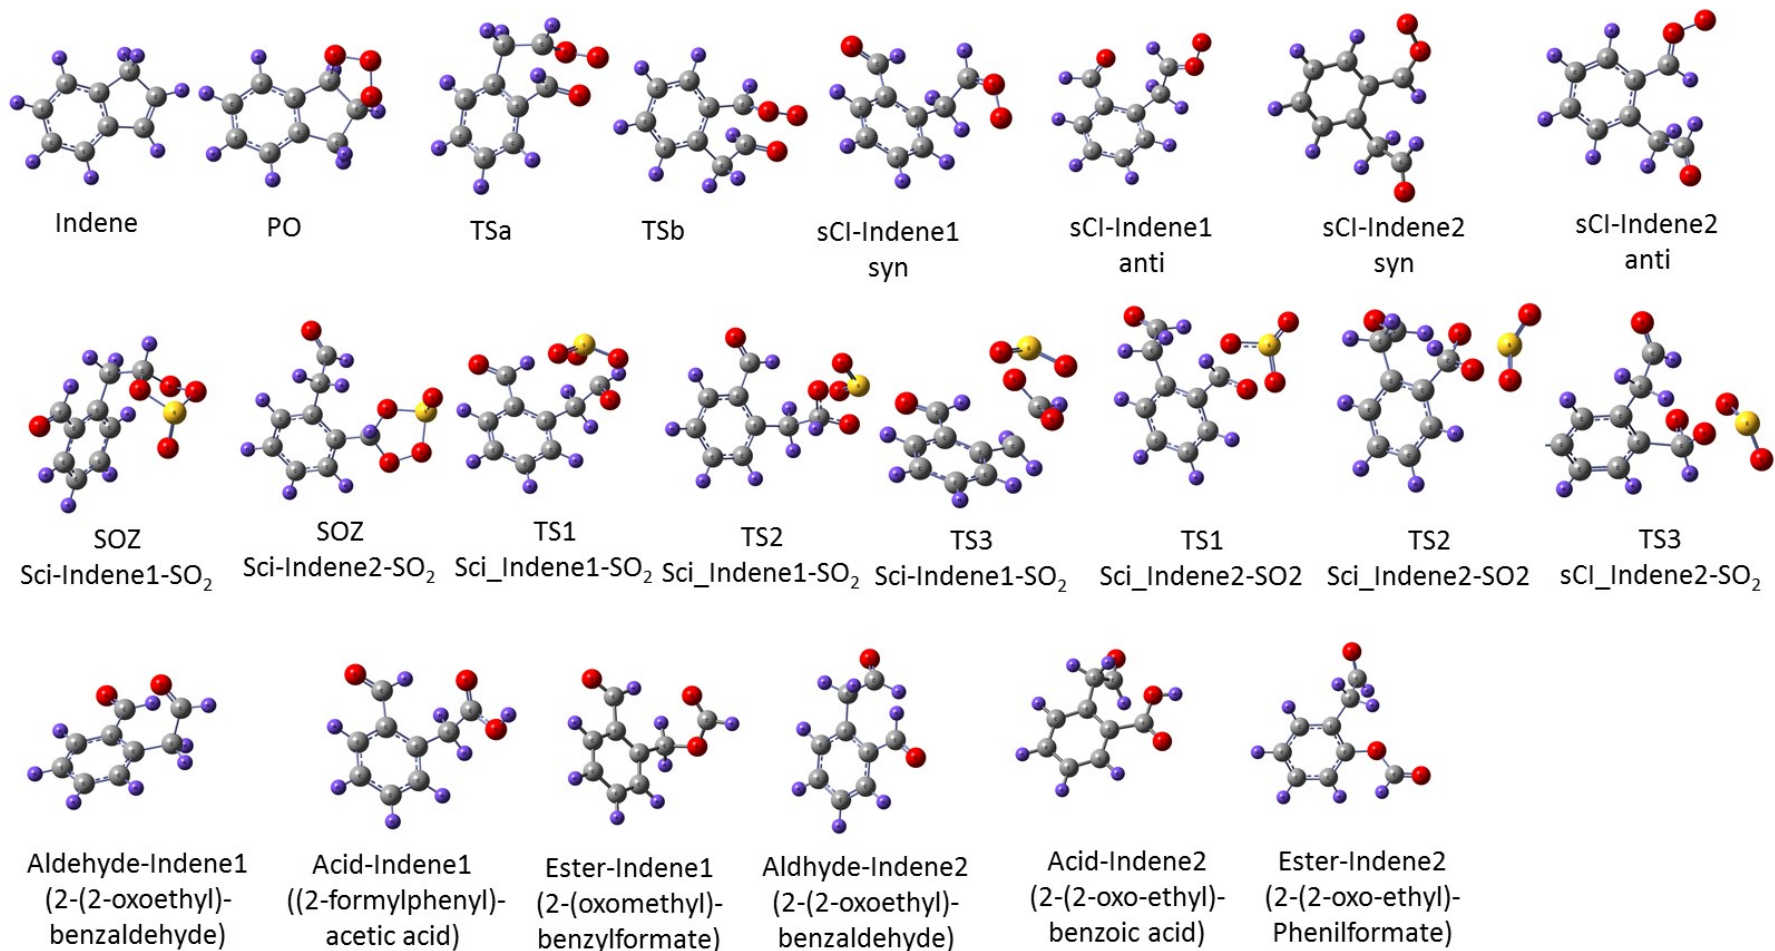

**Fig. S6.** Optimized structures, including reactants, products, secondary ozonide SOZ and transitions states ST, calculated at the BMK/6-311++G(2df,2pd) level of theory. a) Styrene/O<sub>3</sub>/SO<sub>2</sub> system and b) Indene/O<sub>3</sub>/SO<sub>2</sub> system.

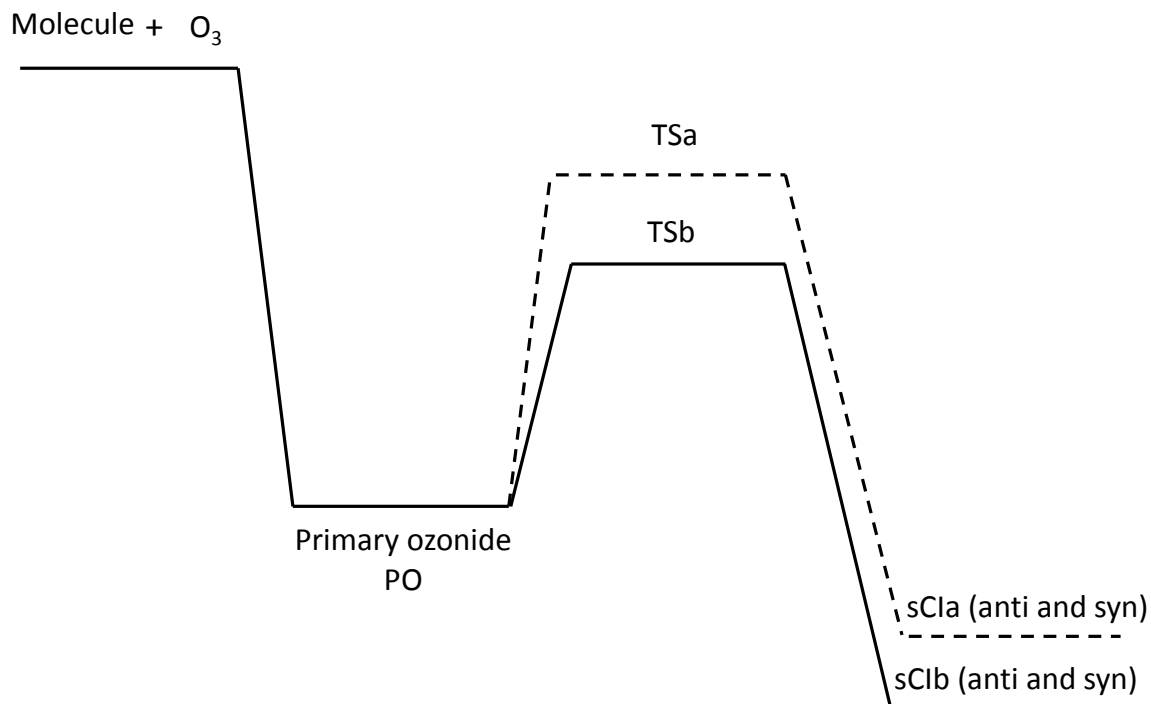

**Fig. S7.** General schematic potential energy surfaces representing the sCI formation in the ozone/Styrene and ozone/Indene systems. TSa is the transition state to form sCI-H<sub>2</sub>COO in styrene system or sCI-Indene1 in the case of indene (sCIa). TSb is the transition state to form sCI-PhCHO for styrene system or sCI-Indene2 in the case of Indene system (sCIb).

**Table S1.** Relative enthalpies at 0 K (in kcal mol<sup>-1</sup>) among molecule + O<sub>3</sub>, adducts (primary cyclic ozonide PO), transition states (TS) and products, calculated at the BMK/6-311++G(2df,2pd) level of theory.

| System                   | Adduct (PO) |       | TSa   | TSb   | sCIa  | sCIa  |       | sCIb  |       |
|--------------------------|-------------|-------|-------|-------|-------|-------|-------|-------|-------|
|                          | 0.0         |       |       |       |       | syn   | anti  | syn   | anti  |
| Styrene + O <sub>3</sub> | 0.0         | -63.3 | -43.5 | -44.2 | -70.0 | -     | -     | -71.9 | -71.4 |
| Indene + O <sub>3</sub>  | 0.0         | -62.8 | -42.3 | -43.3 | -     | -74.3 | -75.3 | -74.1 | -74.6 |

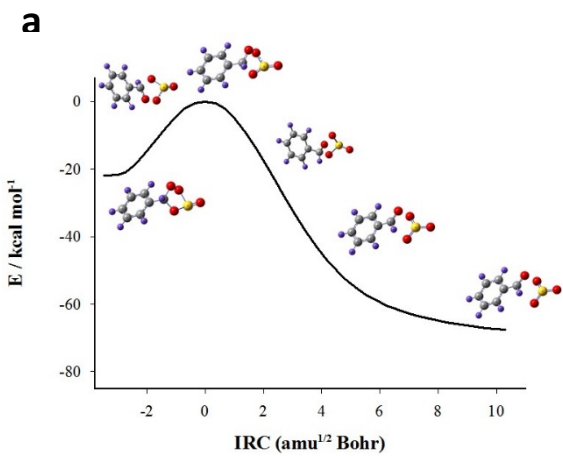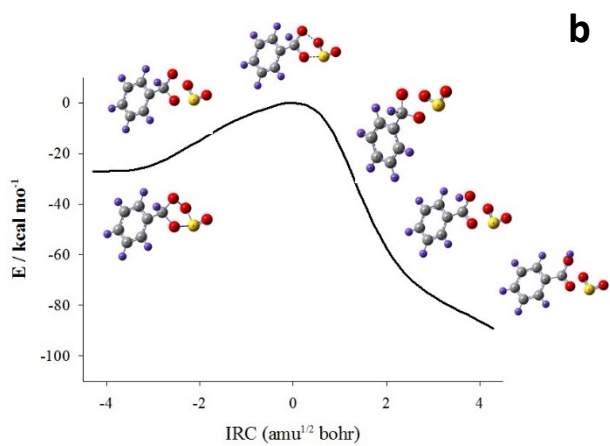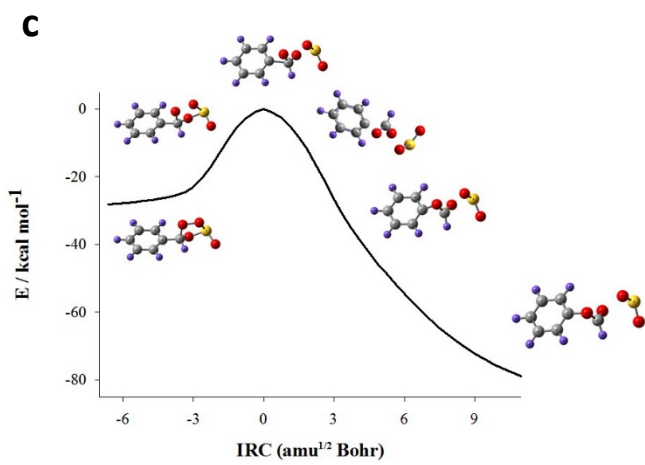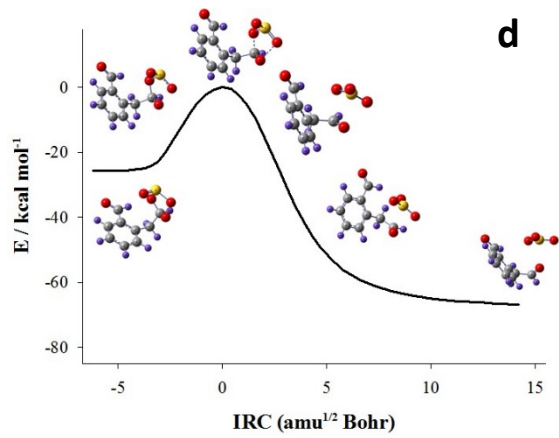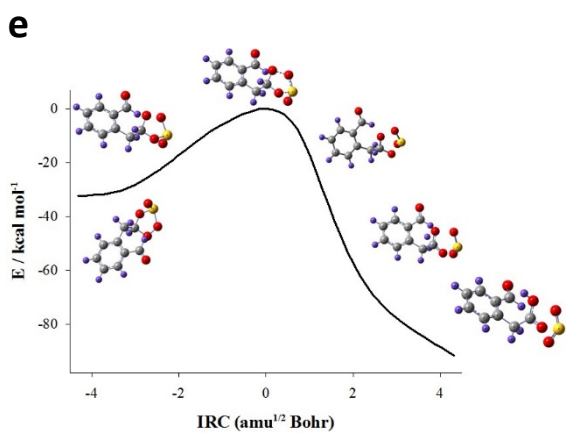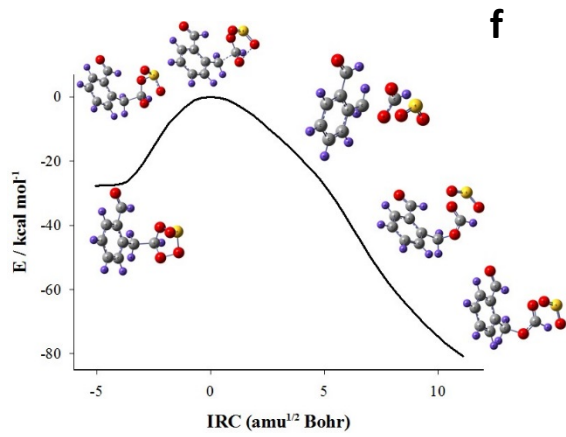



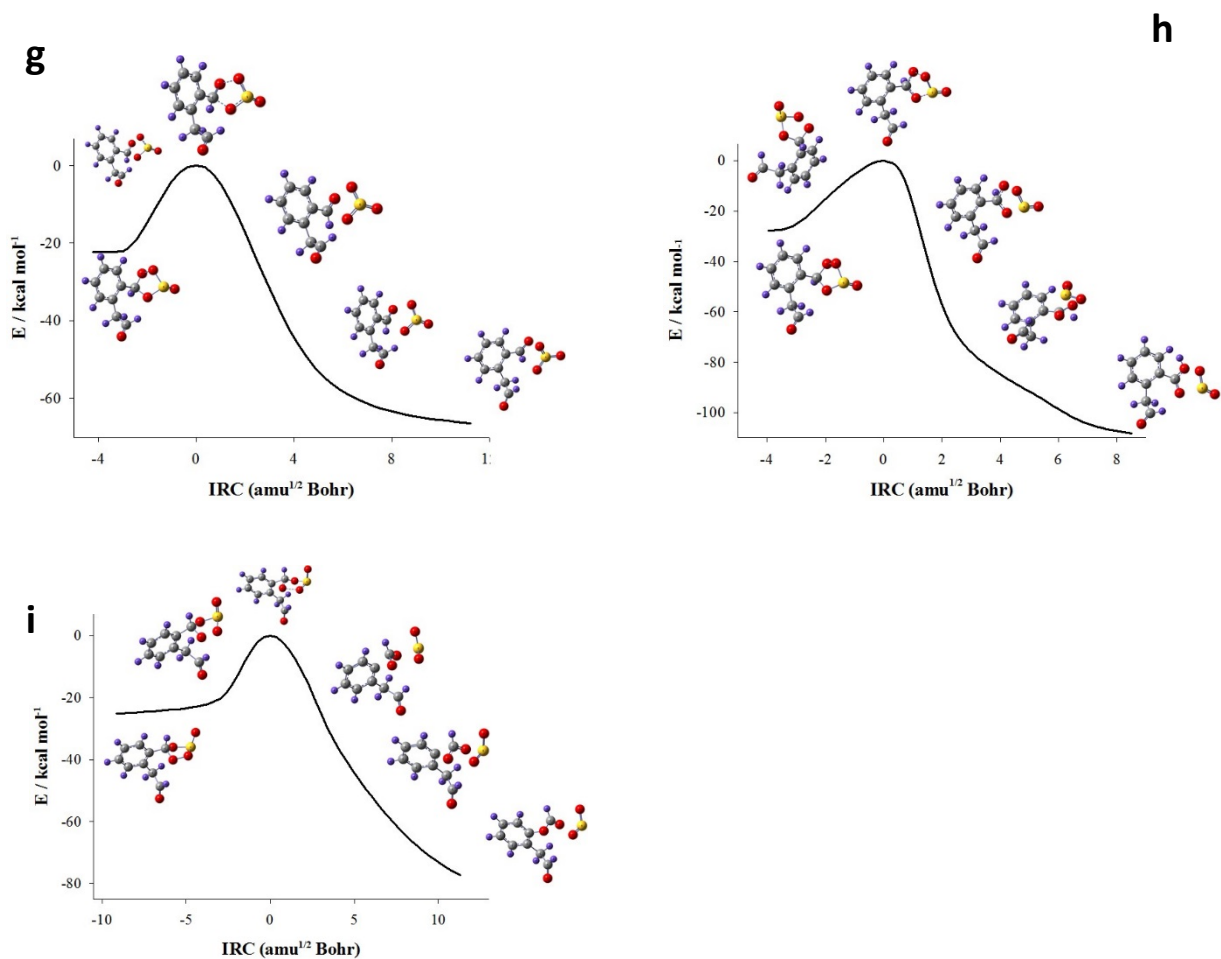

**Fig. S8.** Relative energy along the intrinsic reaction coordinate (IRC) for the studied sCI + SO<sub>2</sub> reactions. a) (R1) in sCI-PhCHOO + SO<sub>2</sub>, b) (R2) in sCI-PhCHOO +SO<sub>2</sub>, c) (R3) in sCI-PhCHOO +SO<sub>2</sub>, d) (R1) in sCI-Indene1 +SO<sub>2</sub>, e) (R2) in sCI-Indene1 +SO<sub>2</sub>, f) (R3) in sCI-Indene1 + SO<sub>2</sub>, g) (R1) in sCI-Indene2 + SO<sub>2</sub>, h) (R2) in sCI-Inden2 +SO<sub>2</sub> and i) (R3) in sCI-Indene2 + SO<sub>2</sub>.

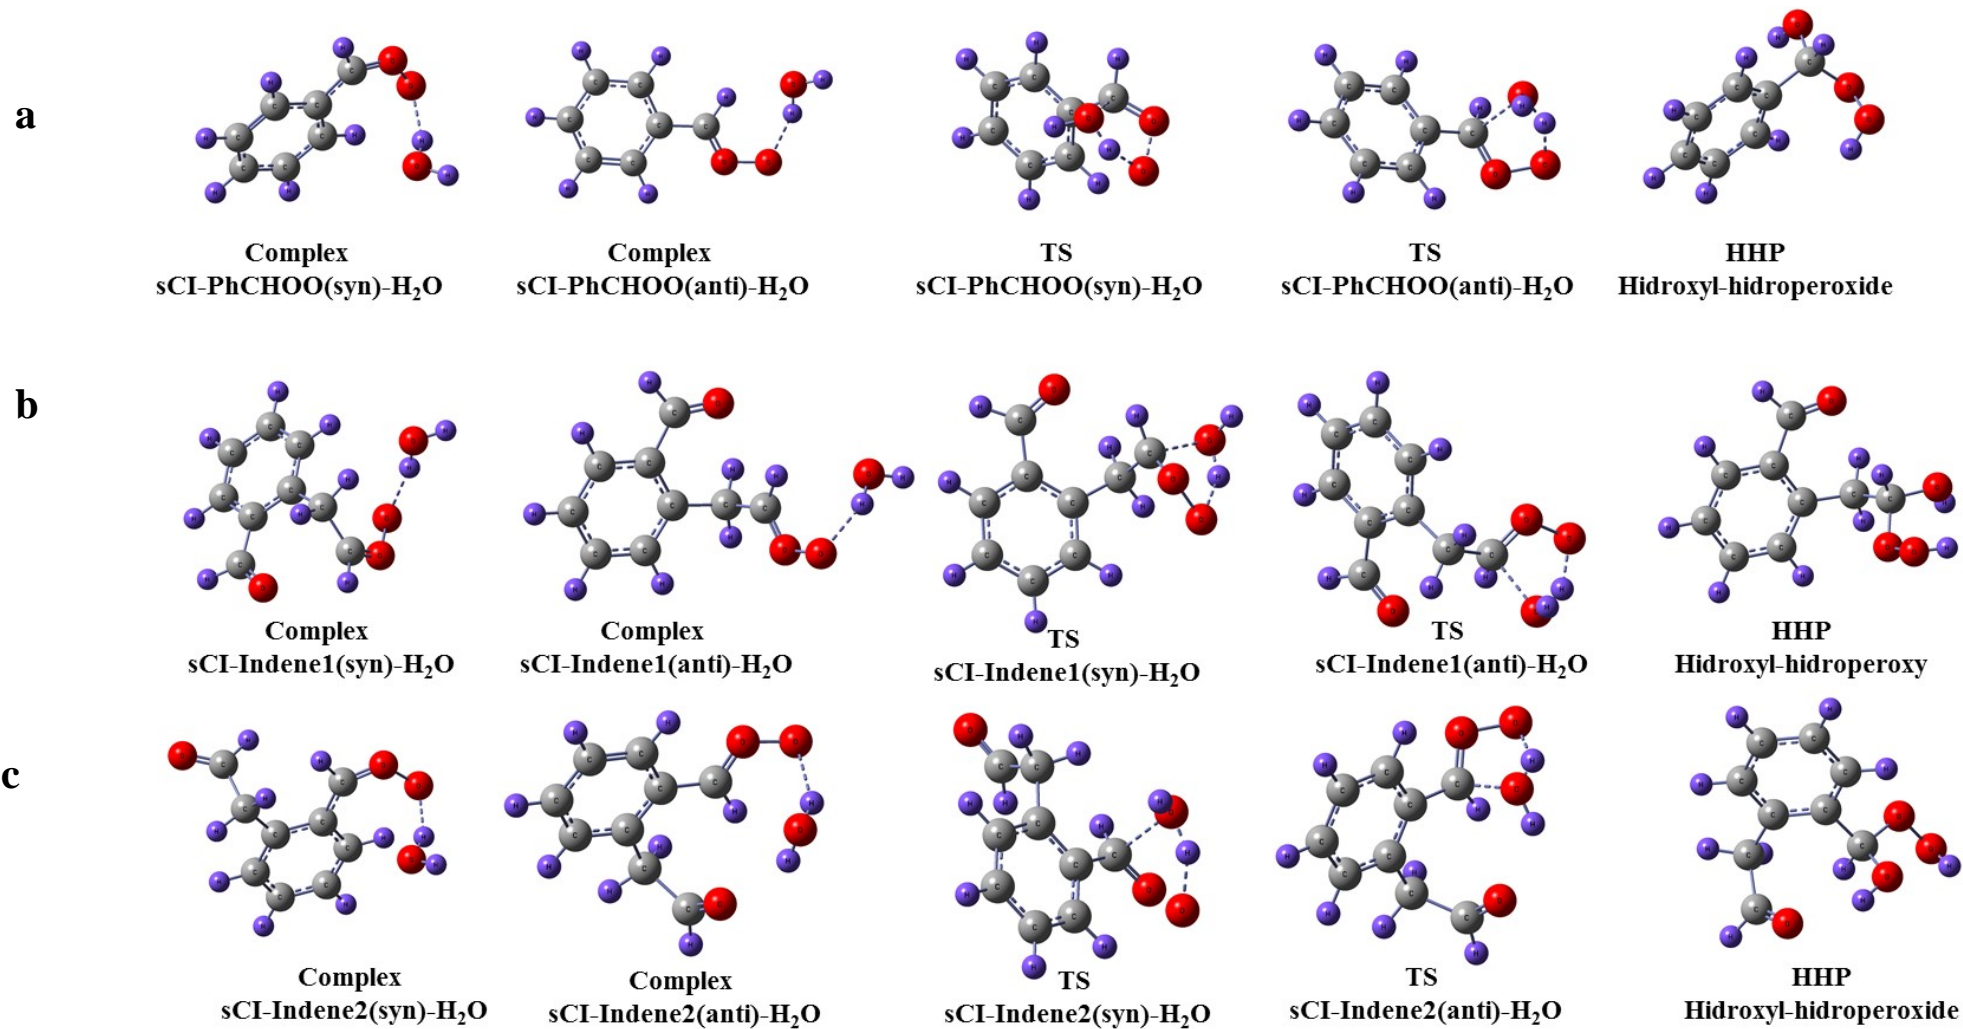

**Fig. S9.** Optimized structures, including complex, products, and transitions states TS, calculated at the BMK/6-311++G(2df,2pd) level of theory. a) sCI-PhCHOO/H<sub>2</sub>O system, b) sCI-Indene1/H<sub>2</sub>O system and c) sCI-Indene2/H<sub>2</sub>O system.

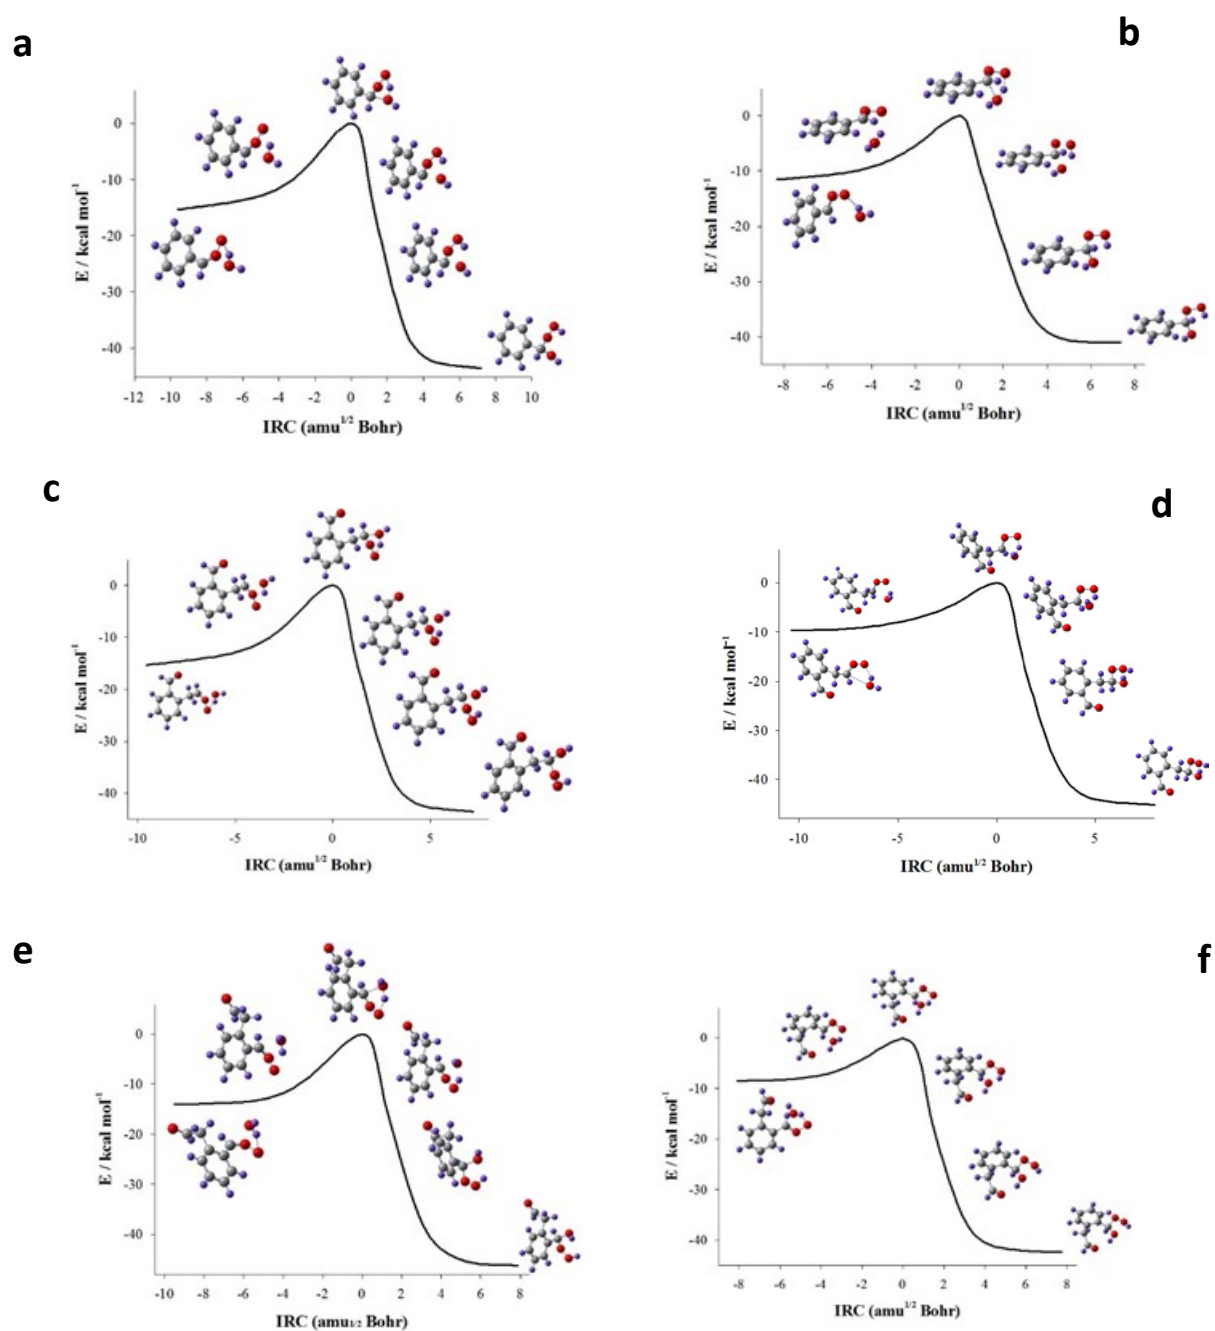

**Fig. S10.** Relative energy along the intrinsic reaction coordinate (IRC) for sCl + H<sub>2</sub>O reactions. a) sCl-PhCHOOsyn + H<sub>2</sub>O b) sCl-PhCHOOanti + H<sub>2</sub>O c) sCl-Indene1syn + H<sub>2</sub>O d) sCl-Indene1anti + H<sub>2</sub>O e) sCl-Indene2syn + H<sub>2</sub>O f) sCl-Indene2anti + H<sub>2</sub>O

## APENDIX A

Vibrational frequencies, rotational constants, and energies of the molecular species involved in the Styrene-Indene/O<sub>3</sub>/SO<sub>2</sub>-H<sub>2</sub>O reactions at BMK/6-311++G(2df,2pd) level of theory

### H<sub>2</sub>COO

Frequencies (cm<sup>-1</sup>): 545, 694, 956, 1021, 1280, 1453, 1647, 3128, 3281

Rotational constants (GHZ): 82.27800 12.60305 10.92899

Zero-point correction= 0.031907 (Hartree/Particle)

Thermal correction to Energy= 0.035146

Thermal correction to Enthalpy= 0.036090

Thermal correction to Gibbs Free Energy= 0.007869

Sum of electronic and zero-point Energies= -189.515909

Sum of electronic and thermal Energies= -189.512670

Sum of electronic and thermal Enthalpies= -189.511726

Sum of electronic and thermal Free Energies= -189.539947

### SO<sub>2</sub>H<sub>2</sub>COO (SOZ)

Frequencies: 140, 296, 396, 483, 568, 679, 722, 749, 924, 1008, 1092, 1157, 1253, 1324, 1412, 1537, 3065, 3157

Rotational constants (GHZ): 6.22472 3.17541 2.64168

Zero-point correction= 0.045482 (Hartree/Particle)

Thermal correction to Energy= 0.050615

Thermal correction to Enthalpy= 0.051559

Thermal correction to Gibbs Free Energy= 0.016428

Sum of electronic and zero-point Energies= -738.085010

Sum of electronic and thermal Energies= -738.079877

Sum of electronic and thermal Enthalpies= -738.078933

Sum of electronic and thermal Free Energies= -738.114064

### ST1\_H<sub>2</sub>COO\_SO<sub>3</sub>

Frequencies: -654, 148, 189, 307, 454, 522, 544, 674, 870, 1004, 1052, 1165, 1296, 1342, 1357, 1492, 2997, 3098

Rotational constants (GHZ): 6.18631 2.88063 2.50738

Zero-point correction= 0.042177 (Hartree/Particle)

Thermal correction to Energy= 0.047612

Thermal correction to Enthalpy= 0.048556  
Thermal correction to Gibbs Free Energy= 0.012717  
Sum of electronic and zero-point Energies= -738.048698  
Sum of electronic and thermal Energies= -738.043263  
Sum of electronic and thermal Enthalpies= -738.042319  
Sum of electronic and thermal Free Energies= -738.078158

## ST2\_H2COO\_SO2

Frequencies: -972, 146, 257, 293, 412, 449, 494, 545, 735, 876, 1057, 1203, 1257, 1340, 1348, 1435, 2506, 3027

Rotational constants (GHZ): 6.04210 2.77440 2.38272  
Zero-point correction= 0.039594 (Hartree/Particle)  
Thermal correction to Energy= 0.045209  
Thermal correction to Enthalpy= 0.046153  
Thermal correction to Gibbs Free Energy= 0.010078  
Sum of electronic and zero-point Energies= -738.040128  
Sum of electronic and thermal Energies= -738.034513  
Sum of electronic and thermal Enthalpies= -738.033569  
Sum of electronic and thermal Free Energies= -738.069644

## H2CO

Frequencies: 1225, 1289, 1557, 1883, 2924, 2995

Rotational constants (GHZ): 283.93174 39.55694 34.71983  
Zero-point correction= 0.027069 (Hartree/Particle)  
Thermal correction to Energy= 0.029933  
Thermal correction to Enthalpy= 0.030878  
Thermal correction to Gibbs Free Energy= 0.005426  
Sum of electronic and zero-point Energies= -114.455977  
Sum of electronic and thermal Energies= -114.453113  
Sum of electronic and thermal Enthalpies= -114.452169  
Sum of electronic and thermal Free Energies= -114.477621

## HCOOH

Frequencies: 528, 683, 1082, 1149, 1292, 1443, 1926, 3008, 3903

Rotational constants (GHZ): 88.39375 11.86757 10.46285

Zero-point correction= 0.034208 (Hartree/Particle)  
 Thermal correction to Energy= 0.037430  
 Thermal correction to Enthalpy= 0.038374  
 Thermal correction to Gibbs Free Energy= 0.010154  
 Sum of electronic and zero-point Energies= -189.700564  
 Sum of electronic and thermal Energies= -189.697341  
 Sum of electronic and thermal Enthalpies= -189.696397  
 Sum of electronic and thermal Free Energies= -189.724618

## Styrene

Frequencies: 84, 230, 261, 418, 453, 461, 566, 632, 677, 731, 790, 823, 874, 964, 982, 1014, 1016, 1038, 1044, 1063, 1063, 1119, 1182, 1222, 1230, 1303, 1342, 1381, 1471, 1493, 1543, 1623, 1649, 1695, 3150, 3159, 3177, 3184, 3193

Rotational constants (GHZ): 5.19667 1.54234 1.18935

Zero-point correction= 0.134311 (Hartree/Particle)  
 Thermal correction to Energy= 0.140856  
 Thermal correction to Enthalpy= 0.141800  
 Thermal correction to Gibbs Free Energy= 0.103514  
 Sum of electronic and zero-point Energies= -309.380097  
 Sum of electronic and thermal Energies= -309.373552  
 Sum of electronic and thermal Enthalpies= -309.372608  
 Sum of electronic and thermal Free Energies= -309.410894

## Cyclic ozonide (PO)

Frequencies: 57, 64, 130, 227, 314, 341, 419, 422, 544, 607, 635, 731, 736, 772, 799, 807, 866, 886, 963, 983, 1005, 1019, 1021, 1042, 1047, 1052, 1066, 1079, 1112, 1183, 1201, 1232, 1263, 1305, 1313, 1350, 1377, 1405, 1499, 1531, 1537, 1635, 1653, 3065, 3078, 3160, 3173, 3181, 3191, 3200, 3207

Rotational constants (GHZ): 3.05384 0.66956 0.62621  
 Zero-point correction= 0.149193 (Hartree/Particle)

Thermal correction to Energy= 0.157741  
 Thermal correction to Enthalpy= 0.158686  
 Thermal correction to Gibbs Free Energy= 0.114476  
 Sum of electronic and zero-point Energies= -534.852162  
 Sum of electronic and thermal Energies= -534.843614  
 Sum of electronic and thermal Enthalpies= -534.842670  
 Sum of electronic and thermal Free Energies= -534.886879

## ST\_Ozonide\_cyclic\_PhCHOO

Frequencies: -467, 49, 96, 138, 211, 253, 341, 412, 421, 449, 545, 550, 605, 636, 678,712, 786, 870, 880, 925, 952 1012, 1019, 1029, 1048, 1062, 1102, 1179, 1186, 1207, 1215, 1246, 1264, 1302, 1314, 1360, 1431, 1435, 1498, 1541, 1576, 1630, 1652, 2955, 3033, 3156, 3173, 3184, 3197, 3205, 3211

Rotational constants (GHZ): 2.88753 0.62590 0.59256

Zero-point correction= 0.145651 (Hartree/Particle)

Thermal correction to Energy= 0.154524

Thermal correction to Enthalpy= 0.155468

Thermal correction to Gibbs Free Energy= 0.110795

Sum of electronic and zero-point Energies= -534.821704

Sum of electronic and thermal Energies= -534.812831

Sum of electronic and thermal Enthalpies= -534.811886

Sum of electronic and thermal Free Energies= -534.856559

### sCI-PhCHOO (syn)

Frequencies: 90, 171, 247, 322, 415, 418, 482, 575, 629, 712, 733, 793, 869, 889, 947, 960, 994, 1015, 1027, 1050, 1056, 1123, 1188, 1215, 1228, 1326, 1377, 1436, 1487, 1527, 1611, 1634, 1645, 3180, 3186, 3188, 3202, 3213, 3270

Rotational constants (GHZ): 4.17818 1.12845 0.88849

Zero-point correction= 0.114897 (Hartree/Particle)// QCISDT= -419.46696084 H0= -419.3520638

Thermal correction to Energy= 0.121893

Thermal correction to Enthalpy= 0.122837

Thermal correction to Gibbs Free Energy= 0.083117

Sum of electronic and zero-point Energies= -420.412006

Sum of electronic and thermal Energies= -420.405010

Sum of electronic and thermal Enthalpies= -420.404066

Sum of electronic and thermal Free Energies= -420.443786

### sCI-PhCHOO (anti)

Frequencies: 99, 148, 188, 296, 379, 415, 441, 508, 629, 655, 713, 792, 880, 881, 970, 999, 1016, 1017, 1023, 1045, 1050, 1110, 1186, 1208, 1245, 1319, 1366, 1408, 1487, 1537, 1613, 1641, 1653, 3174, 3187, 3194, 3204, 3213, 3220

Rotational constants (GHZ): 5.20306 0.92101 0.78250

Zero-point correction= 0.114160 (Hartree/Particle)

Thermal correction to Energy= 0.121434

Thermal correction to Enthalpy= 0.122378

Thermal correction to Gibbs Free Energy= 0.082048

Sum of electronic and zero-point Energies= -420.411174

Sum of electronic and thermal Energies= -420.403900

Sum of electronic and thermal Enthalpies= -420.402956

Sum of electronic and thermal Free Energies= -420.443286

## SO<sub>2</sub>

Frequencies: 547, 1235, 1432

Rotational constants (GHZ): 59.47045 10.48214 8.91143

Zero-point correction= 0.007324 (Hartree/Particle)

Thermal correction to Energy= 0.010369

Thermal correction to Enthalpy= 0.011313

Thermal correction to Gibbs Free Energy= -0.016813

Sum of electronic and zero-point Energies= -548.510535

Sum of electronic and thermal Energies= -548.507490

Sum of electronic and thermal Enthalpies= -548.506545

Sum of electronic and thermal Free Energies= -548.534671

## SO<sub>2</sub>\_sCI-Styrene (SOZ)

Frequencies: 42, 52, 128, 157, 238, 296, 408, 416, 427, 459, 544, 586, 634, 640, 687, 727, 751, 780, 786, 888, 891, 928, 970, 996, 1020, 1022, 1046, 1050, 1081, 1115, 1185, 1210, 1240, 1297, 1308, 1327, 1359, 1391, 1493, 1536, 1635, 1653, 3103, 3186, 3193, 3203, 3210, 3223

Rotational constants (GHZ): 2.39049 0.50127 0.45994

Zero-point correction= 0.126485 (Hartree/Particle)

Thermal correction to Energy= 0.136033

Thermal correction to Enthalpy= 0.136977

Thermal correction to Gibbs Free Energy= 0.089958

Sum of electronic and zero-point Energies= -968.965160

Sum of electronic and thermal Energies= -968.955612

Sum of electronic and thermal Enthalpies= -968.954668

Sum of electronic and thermal Free Energies= -969.001686

## ST1\_sCI-PhCHOO\_aldehyde\_SO<sub>3</sub>

Frequencies: -619, 56, 67, 107, 157, 233, 268, 352, 416, 419, 474, 517, 557, 586, 633, 642, 718, 733, 805, 849, 890, 921, 976, 1020, 1027, 1034, 1047, 1053, 1110, 1141, 1184, 1210, 1219, 1256, 1315, 1324, 1369, 1427, 1498, 1544, 1635, 1654, 3027, 3183, 3188, 3203, 3213, 3221

Rotational constants (GHZ): 2.32297 0.48580 0.45631

1 imaginary frequencies ignored.



Zero-point correction= 0.124118 (Hartree/Particle)  
 Thermal correction to Energy= 0.133745  
 Thermal correction to Enthalpy= 0.134689  
 Thermal correction to Gibbs Free Energy= 0.087759  
 Sum of electronic and zero-point Energies= -968.932225  
 Sum of electronic and thermal Energies= -968.922599  
 Sum of electronic and thermal Enthalpies= -968.921655  
 Sum of electronic and thermal Free Energies= -968.968585

## ST2\_Styrene\_organic acid\_SO<sub>2</sub>

Frequencies: -896, 42, 59, 111, 196, 204, 230, 285, 412, 418, 449, 465, 511, 549, 563, 634, 668, 714, 754, 822, 851, 882, 914, 986, 1019, 1022, 1041, 1049, 1052, 1114, 1141, 1186, 1221, 1312, 1318, 1340, 1361, 1382, 1494, 1542, 1633, 1647, 2514, 3186, 3195, 3206, 3214, 3216,  
 Rotational constants (GHZ): 2.27436 0.48193 0.44594

Zero-point correction= 0.121037 (Hartree/Particle)  
 Thermal correction to Energy= 0.131071  
 Thermal correction to Enthalpy= 0.132015  
 Thermal correction to Gibbs Free Energy= 0.084124  
 Sum of electronic and zero-point Energies= -968.927420  
 Sum of electronic and thermal Energies= -968.917387  
 Sum of electronic and thermal Enthalpies= -968.916442  
 Sum of electronic and thermal Free Energies= -968.964334

## ST3\_Styrene\_ester\_SO<sub>2</sub>

Frequencies: -584, 76, 92, 101, 157, 239, 264, 321, 381, 408, 425, 471, 513, 581, 622, 636, 696, 720, 784, 804, 871, 978, 1006, 1019, 1021, 1033, 1050, 1057, 1108, 1162, 1186, 1207, 1251, 1275, 1293, 1333, 1354, 1418, 1491, 1513, 1618, 1621, 3068, 3192, 3204, 3214, 3221, 3232

Rotational constants (GHZ): 2.77028 0.43594 0.41778  
 Zero-point correction= 0.123680 (Hartree/Particle)  
 Thermal correction to Energy= 0.133442  
 Thermal correction to Enthalpy= 0.134386  
 Thermal correction to Gibbs Free Energy= 0.087617  
 Sum of electronic and zero-point Energies= -968.924418  
 Sum of electronic and thermal Energies= -968.914657  
 Sum of electronic and thermal Enthalpies= -968.913713  
 Sum of electronic and thermal Free Energies= -968.960482

## SO<sub>3</sub>

Frequencies: 520, 546, 546, 1149, 1484, 1490

Rotational constants (GHZ): 10.52783 10.50793 5.25894

Zero-point correction= 0.013065 (Hartree/Particle)

Thermal correction to Energy= 0.016522

Thermal correction to Enthalpy= 0.017467

Thermal correction to Gibbs Free Energy= -0.013261

Sum of electronic and zero-point Energies= -623.690125

Sum of electronic and thermal Energies= -623.686668

Sum of electronic and thermal Enthalpies= -623.685723

Sum of electronic and thermal Free Energies= -623.716451

## Aldehyde\_Styrene P1

Frequencies: 116, 215, 249, 422, 443, 471, 629, 664, 720, 784, 841, 890, 976, 1018, 1026, 1042, 1054, 1064, 1098, 1181, 1194, 1232, 1316, 1350, 1441, 1494, 1532, 1629, 1645, 1848, 2930, 3180, 3188, 3199, 3207, 3215

Rotational constants (GHZ): 5.25632 1.56584 1.20645

Zero-point correction= 0.110504 (Hartree/Particle)

Thermal correction to Energy= 0.116769

Thermal correction to Enthalpy= 0.117713

Thermal correction to Gibbs Free Energy= 0.079956

Sum of electronic and zero-point Energies= -345.346933

Sum of electronic and thermal Energies= -345.340668

Sum of electronic and thermal Enthalpies= -345.339724

Sum of electronic and thermal Free Energies= -345.377481

## Organic acid\_Styrene P2

Frequencies: 69, 164, 217, 388, 418, 440, 502, 587, 632, 651, 717, 752, 786, 85, 889, 992, 1020, 1030, 1047, 1050, 1100, 1140, 1185, 1199, 1222, 1315, 1354, 1403, 1492, 1533, 1632, 1648.1851, 1859, 3186, 3197, 3207, 3219, 3220, 3861,

Rotational constants (GHZ): 3.90372 1.22840 0.93438

Zero-point correction= 0.116582 (Hartree/Particle)

Thermal correction to Energy= 0.123626

Thermal correction to Enthalpy= 0.124570

Thermal correction to Gibbs Free Energy= 0.084609

Sum of electronic and zero-point Energies= -420.596067

Sum of electronic and thermal Energies= -420.589024  
Sum of electronic and thermal Enthalpies= -420.588080  
Sum of electronic and thermal Free Energies= -420.628041

### **Ester\_Styrene P3**

Frequencies: 71, 135, 179, 305, 407, 429, 464, 557, 629, 686, 724, 795, 876, 899, 948, 1019, 1021, 1032, 1047, 1076, 1100, 1172, 1180, 1203, 1286, 1303, 1360, 1638, 1646, 1907, 3032, 3190, 3199, 3206, 3213, 3221

Rotational constants (GHZ): 5.03989 0.98020 0.84156

Zero-point correction= 0.115332 (Hartree/Particle)

Thermal correction to Energy= 0.122552

Thermal correction to Enthalpy= 0.123496

Thermal correction to Gibbs Free Energy= 0.083009

Sum of electronic and zero-point Energies= -420.566766

Sum of electronic and thermal Energies= -420.559546

Sum of electronic and thermal Enthalpies= -420.558602

Sum of electronic and thermal Free Energies= -420.599089

### **Complex sCI-PhCHOO(syn)-H<sub>2</sub>O**

Frequencies: 26, 63, 127, 175, 217, 219, 260, 328, 413, 420, 482, 562, 580, 632, 703, 736, 775, 802, 857, 864, 936, 948, 979, 1014, 1024, 1040, 1051, 1116, 1184, 1205, 1230, 1332, 1357, 1454, 1484, 1522, 1611, 1638, 1659, 1790, 3177, 3186, 3191, 3201, 3213, 3277, 3662, 3986

Rotational constants (GHZ): 2.21388 0.86161 0.76243

Zero-point correction= 0.140576 (Hartree/Particle)

Thermal correction to Energy= 0.150513

Thermal correction to Enthalpy= 0.151457

Thermal correction to Gibbs Free Energy= 0.104224

Sum of electronic and zero-point Energies= -496.818551

Sum of electronic and thermal Energies= -496.808614

Sum of electronic and thermal Enthalpies= -496.807670

Sum of electronic and thermal Free Energies= -496.854903

### **Complex sCI-PhCHOO(anti)-H<sub>2</sub>O**

Frequencies: 25, 80, 87, 116, 151, 186, 269, 304, 384, 415, 455, 508, 542, 638, 659, 684, 711, 791, 883, 890, 973, 988, 1020, 1023, 1044, 1049, 1050, 1116, 1186, 1215, 1263, 1323, 1372, 1453, 1487, 1540, 1616, 1645, 1659, 1696, 3169, 3189, 3200, 3207, 3212, 3221, 3597, 3996

Rotational constants (GHZ): 2.89699 0.64166 0.52992

Zero-point correction= 0.139626 (Hartree/Particle)

|                                              |             |
|----------------------------------------------|-------------|
| Thermal correction to Energy=                | 0.150024    |
| Thermal correction to Enthalpy=              | 0.150968    |
| Thermal correction to Gibbs Free Energy=     | 0.102297    |
| Sum of electronic and zero-point Energies=   | -496.821733 |
| Sum of electronic and thermal Energies=      | -496.811335 |
| Sum of electronic and thermal Enthalpies=    | -496.810391 |
| Sum of electronic and thermal Free Energies= | -496.859063 |

### ST-PhCHOO(syn)-H<sub>2</sub>O

Frequencies: -553, 54, 110, 221, 276, 294, 378, 412, 418, 513, 548, 624, 628, 703, 711, 744, 779, 861, 877, 911, 967, 1017, 1019, 1042, 1054, 1075, 1126, 1178, 1181, 1224, 1242, 1313, 1375, 1402, 1483, 1536, 1553, 1628, 1648, 1668, 2176, 3167, 3179, 3187, 3204, 3211, 3287, 3926

Rotational constants (GHZ): 2.78016 0.90687 0.78168

Zero-point correction= 0.139273 (Hartree/Particle)

Thermal correction to Energy= 0.147582

Thermal correction to Enthalpy= 0.148526

Thermal correction to Gibbs Free Energy= 0.105622

Sum of electronic and zero-point Energies= -496.794146

Sum of electronic and thermal Energies= -496.785837

Sum of electronic and thermal Enthalpies= -496.784893

Sum of electronic and thermal Free Energies= -496.827797

### ST-PhCHOO(anti)-H<sub>2</sub>O

Frequencies: -677, 61, 101, 154, 251, 322, 373, 417, 428, 510, 564, 598, 634, 651, 709, 720, 800, 884, 897, 969, 978, 1021, 1033, 1046, 1050, 1095, 1111, 1185, 1188, 1213, 1240, 1313, 1368, 1381, 1482, 1537, 1562, 1592, 1632, 1651, 1981, 3185, 3189, 3196, 3206, 3215, 3223, 3927

Rotational constants (GHZ): 3.24720 0.76494 0.69051

Zero-point correction= 0.138616 (Hartree/Particle)

Thermal correction to Energy= 0.147034

Thermal correction to Enthalpy= 0.147978

Thermal correction to Gibbs Free Energy= 0.104710

Sum of electronic and zero-point Energies= -496.803723

Sum of electronic and thermal Energies= -496.795305

Sum of electronic and thermal Enthalpies= -496.794361

Sum of electronic and thermal Free Energies= -496.837629

## Product-PhCHOO(anti)-H<sub>2</sub>O

Frequencies: 52, 100, 171, 213, 253, 279, 320, 374, 419, 465, 527, 593, 634, 658, 734, 795, 836, 889, 970, 1019, 1019, 1029, 1041, 1049, 1073, 1108, 1142, 1183, 1206, 1240, 1289, 1323, 1351, 1384, 1429, 1441, 1496, 1536, 1632, 1652, 3104, 3178, 3208, 3821, 3909

Rotational constants (GHZ): 2.45786 0.91293 0.83407

Zero-point correction= 0.142886 (Hartree/Particle)

Thermal correction to Energy= 0.151973

Thermal correction to Enthalpy= 0.152918

Thermal correction to Gibbs Free Energy= 0.108374

Sum of electronic and zero-point Energies= -496.859962

Sum of electronic and thermal Energies= -496.850874

Sum of electronic and thermal Enthalpies= -496.849930

Sum of electronic and thermal Free Energies= -496.894474

## Indene

Frequencies: 199, 216, 375, 405, 437, 540, 571, 597, 736, 737, 756, 808, 840, 870, 908, 961, 965, 992, 1007, 1028, 1042, 1096, 1141, 1156, 1177, 1187, 1230, 1258, 1309, 1344, 1398, 1460, 1491, 1501, 1600, 1635, 1653, 3038, 3069, 3178, 3185, 3194, 3200, 3206, 3224

Rotational constants (GHZ): 3.78961 1.58168 1.12367

Zero-point correction= 0.141067 (Hartree/Particle)

Thermal correction to Energy= 0.147398

Thermal correction to Enthalpy= 0.148342

Thermal correction to Gibbs Free Energy= 0.110625

Sum of electronic and zero-point Energies= -347.477687

Sum of electronic and thermal Energies= -347.471355

Sum of electronic and thermal Enthalpies= -347.470411

Sum of electronic and thermal Free Energies= -347.508128

## IndeneOOcyclic (PO)

Frequencies: 60, 109, 178, 288, 328, 392, 411, 448, 524, 546, 609, 653, 728, 738, 769, 786, 850, 864, 874, 880, 909, 947, 977, 1010, 1023, 1030, 1043, 1086, 1092, 1120, 1172, 1201, 1220, 1234, 1250, 1287, 1314, 1322, 1362, 1369, 1390, 1493, 1498, 1522, 1629, 1652, 3068, 3072, 3090, 3111, 3174, 3182, 3191, 3203

Rotational constants (GHZ): 2.21530 0.74898 0.60585

Zero-point correction= 0.155546 (Hartree/Particle)

Thermal correction to Energy= 0.164015

Thermal correction to Enthalpy= 0.164959

Thermal correction to Gibbs Free Energy= 0.121367  
Sum of electronic and zero-point Energies= -572.948931  
Sum of electronic and thermal Energies= -572.940463  
Sum of electronic and thermal Enthalpies= -572.939519  
Sum of electronic and thermal Free Energies= -572.983111

## ST\_IndeneOOcyclic\_sCl-Indene1

Frequencies: -436, 74, 129, 202, 270, 304, 373, 416, 429, 477, 496, 540, 608, 626, 663, 712, 737, 772, 824, 846, 893, 926, 953, 995, 1033, 1037, 1046, 1106, 1117, 1170, 1177, 1195, 1229, 1254, 1276, 1304, 1323, 1339, 1356, 1430, 1476, 1491, 1512, 1521, 1626, 1649, 2924, 3066, 3109, 3175, 3180, 3189, 3200, 3208

Rotational constants (GHZ): 1.98753 0.76411 0.61967

Zero-point correction= 0.152604 (Hartree/Particle)/

Thermal correction to Energy= 0.161270  
Thermal correction to Enthalpy= 0.162214  
Thermal correction to Gibbs Free Energy= 0.118548  
Sum of electronic and zero-point Energies= -572.916365  
Sum of electronic and thermal Energies= -572.907699  
Sum of electronic and thermal Enthalpies= -572.906755  
Sum of electronic and thermal Free Energies= -572.950422

## sCl\_Indene1 (syn)

Frequencies: 46, 89, 96, 146, 191, 243, 268, 297, 433, 467, 476, 506, 518, 612, 648, 689, 756, 794, 812, 843, 912, 944, 953, 972, 1024, 1041, 1046, 1062, 1076, 1127, 1184, 1199, 1235, 1245, 1319, 1322, 1337, 1410, 1474, 1494, 1521, 1538, 1621, 1640, 1661, 1842, 2952, 3094, 3152, 3184, 3191, 3205, 3218, 3248

Rotational constants (GHZ): 1.30405 0.75704 0.52090

Zero-point correction= 0.153497 (Hartree/Particle)

Thermal correction to Energy= 0.163684  
Thermal correction to Enthalpy= 0.164628  
Thermal correction to Gibbs Free Energy= 0.116780  
Sum of electronic and zero-point Energies= -572.967299  
Sum of electronic and thermal Energies= -572.957112  
Sum of electronic and thermal Enthalpies= -572.956168  
Sum of electronic and thermal Free Energies= -573.004016

## sCl\_Indene1 (anti)

Frequencies: 41, 72, 113, 144, 190, 243, 254, 307, 315, 413, 435, 469, 514, 599, 608, 677, 753, 768, 798, 874, 911, 926, 987, 1001, 1023, 1047, 1048, 1065, 1097, 1153, 1199, 1214, 1221, 1236, 1318, 1321, 1346, 1453, 1462, 1497, 1498, 1531, 1621, 1647, 1673, 1838, 2953, 3085, 3144, 3186, 3191, 3203, 3206, 3216

Rotational constants (GHZ): 1.39877 0.64677 0.49170  
 Zero-point correction= 0.152875 (Hartree/Particle)//  
 Thermal correction to Energy= 0.163349  
 Thermal correction to Enthalpy= 0.164293  
 Thermal correction to Gibbs Free Energy= 0.115713  
 Sum of electronic and zero-point Energies= -572.968926  
 Sum of electronic and thermal Energies= -572.958452  
 Sum of electronic and thermal Enthalpies= -572.957508  
 Sum of electronic and thermal Free Energies= -573.006087

### **SO<sub>2</sub>\_sCI-Indene1 (SOZ)**

Frequencies: 31, 39, 69, 104, 127, 183, 220, 254, 283, 329, 337, 390, 460, 468, 481, 504, 531, 579, 648, 652, 696, 714, 761, 767, 783, 825, 842, 868, 919, 959, 973, 1010, 1029, 1031, 1074, 1087, 1115, 1141, 1190, 1212, 1233, 1241, 1317, 1324, 1328, 1352, 1381, 1413, 1452, 1473, 1494, 1532, 1625, 1648, 1840, 3016, 3067, 3083, 3122, 3186, 3198, 3209, 3220

Rotational constants (GHZ): 0.83304 0.43446 0.38615  
 Zero-point correction= 0.165040 (Hartree/Particle)  
 Thermal correction to Energy= 0.177700  
 Thermal correction to Enthalpy= 0.178644  
 Thermal correction to Gibbs Free Energy= 0.124218  
 Sum of electronic and zero-point Energies= -1121.530358  
 Sum of electronic and thermal Energies= -1121.517698  
 Sum of electronic and thermal Enthalpies= -1121.516753  
 Sum of electronic and thermal Free Energies= -1121.571180

### **ST1\_sCI-Indene1\_aldehyde\_SO<sub>3</sub>**

Frequencies: -626, 17, 39, 66, 101, 128, 158, 198, 211, 234, 272, 286, 399, 440, 455, 476, 489, 523, 529, 547, 615, 646, 719, 760, 778, 830, 844, 871, 924, 939, 962, 1012, 1033, 1057, 1060, 1063, 1109, 1177, 1191, 1213, 1231, 1239, 1296, 1314, 1326, 1352, 1375, 1430, 1460, 1491, 1522, 1536, 1624, 1644, 1842, 2995, 3048, 3091, 3156, 3184, 3193, 3207, 3216

Rotational constants (GHZ): 0.82141 0.42264 0.37208  
 Zero-point correction= 0.162085 (Hartree/Particle)  
 Thermal correction to Energy= 0.175205  
 Thermal correction to Enthalpy= 0.176149  
 Thermal correction to Gibbs Free Energy= 0.120101  
 Sum of electronic and zero-point Energies= -1121.492295  
 Sum of electronic and thermal Energies= -1121.479176

Sum of electronic and thermal Enthalpies= -1121.478231

Sum of electronic and thermal Free Energies= -1121.534279

## ST2\_sCI-Indene1\_organic acid\_SO2

Frequencies: -921, 26, 47, 75, 95, 121, 156, 180, 249, 257, 278, 294, 344, 376, 452, 458, 478, 503, 518, 560, 604, 623, 648, 734, 765, 782, 824, 870, 905, 911, 918, 985, 997, 1023, 1034, 1036, 1071, 1120, 1189, 1206, 1217, 1239, 1265, 1283, 1308, 1322, 1339, 1388, 1460, 1488, 1500, 1533, 1624, 1647, 1843, 2513, 2998, 3070, 3126, 3176, 3191, 3204, 3219.

Rotational constants (GHZ): 1.08066 0.34276 0.29133

Zero-point correction= 0.158715 (Hartree/Particle)

Thermal correction to Energy= 0.172020

Thermal correction to Enthalpy= 0.172965

Thermal correction to Gibbs Free Energy= 0.117123

Sum of electronic and zero-point Energies= -1121.482094

Sum of electronic and thermal Energies= -1121.468789

Sum of electronic and thermal Enthalpies= -1121.467845

Sum of electronic and thermal Free Energies= -1121.523687

## ST3\_sCI-Indene1\_ester\_SO2

Frequencies: -419, 27, 40, 72, 102, 109, 126, 182, 211, 259, 308, 338, 356, 428, 435, 472, 475, 488, 521, 535, 603, 619, 647, 734, 755, 790, 819, 847, 904, 918, 999, 1010, 1036, 1047, 1068, 1077, 1089, 1145, 1192, 1203, 1220, 1238, 1272, 1316, 1322, 1329, 1385, 1448, 1476, 1493, 1505, 1529, 1618, 1638, 1845, 3003, 3035, 3123, 3189, 3197, 3210, 3213, 3221

Rotational constants (GHZ): 0.82239 0.39335 0.35555

Zero-point correction= 0.161332 (Hartree/Particle)

Thermal correction to Energy= 0.174609

Thermal correction to Enthalpy= 0.175554

Thermal correction to Gibbs Free Energy= 0.119517

Sum of electronic and zero-point Energies= -1121.489663

Sum of electronic and thermal Energies= -1121.476386

Sum of electronic and thermal Enthalpies= -1121.475442

Sum of electronic and thermal Free Energies= -1121.531479

## Aldehyde\_Indene1 P1

Frequencies: 62, 100, 106, 135, 248, 262, 307, 366, 458, 472, 509, 522, 645, 690, 751, 764, 786, 832, 861, 908, 949, 996, 1039, 1041, 1063, 1066, 1123, 1179, 1207, 1225, 1235, 1309, 1315, 1364, 1433, 1481, 1489, 1518, 1535, 1626, 1645, 1842, 1882, 2931, 2999, 3040, 3079, 3176, 3189, 3200, 3213

Rotational constants (GHZ): 1.43890 1.06735 0.68975



Zero-point correction= 0.148483 (Hartree/Particle)  
Thermal correction to Energy= 0.157953  
Thermal correction to Enthalpy= 0.158897  
Thermal correction to Gibbs Free Energy= 0.113080  
Sum of electronic and zero-point Energies= -497.903648  
Sum of electronic and thermal Energies= -497.894179  
Sum of electronic and thermal Enthalpies= -497.893234  
Sum of electronic and thermal Free Energies= -497.939051

## **Organic acid\_Indene1 P2**

Frequencies: 35, 63, 88, 122, 226, 243, 294, 312, 456, 460, 486, 513, 526, 613, 641, 649, 745, 771, 795, 830, 875, 906, 937, 971, 1010, 1045, 1067, 1078, 1109, 1156, 1189, 1210, 1233, 1246, 1311, 1320, 1330, 1401, 1446, 1494, 1526, 1535, 1623, 1646, 1836, 1882, 3018, 3105, 3162, 3186, 3197, 3208, 3217, 3846

Rotational constants (GHZ): 1.25025 0.80797 0.53605

Zero-point correction= 0.155357 (Hartree/Particle)  
Thermal correction to Energy= 0.165588  
Thermal correction to Enthalpy= 0.166532  
Thermal correction to Gibbs Free Energy= 0.118133  
Sum of electronic and zero-point Energies= -573.154235  
Sum of electronic and thermal Energies= -573.144003  
Sum of electronic and thermal Enthalpies= -573.143059  
Sum of electronic and thermal Free Energies= -573.191459

## **Ester\_Indene1 P3**

Frequencies: 40, 58, 101, 141, 225, 232, 271, 307, 384, 398, 460, 472, 515, 625, 654, 750, 785, 794, 830, 855, 914, 955, 1000, 1021, 1036, 1058, 1067, 1070, 1126, 1181, 1212, 1224, 1239, 1296, 1313, 1350, 1420, 1431, 1478, 1489, 1530, 1551, 1626, 1647, 1838, 1854, 3058, 3089, 3111, 3172, 3174, 3188, 3200, 3212

Rotational constants (GHZ): 1.23975 0.83756 0.56310

Zero-point correction= 0.154980 (Hartree/Particle)  
Thermal correction to Energy= 0.165245  
Thermal correction to Enthalpy= 0.166190  
Thermal correction to Gibbs Free Energy= 0.117882  
Sum of electronic and zero-point Energies= -573.130742  
Sum of electronic and thermal Energies= -573.120477  
Sum of electronic and thermal Enthalpies= -573.119533  
Sum of electronic and thermal Free Energies= -573.167840

## Complex\_sCI\_Indene1(syn)-H<sub>2</sub>O

Frequencies: 4, 68, 82, 114, 125, 178, 189, 199, 241, 260, 276, 334, 392, 421, 443, 467, 514, 528, 607, 678, 728, 741, 773, 795, 810, 879, 910, 925, 969, 992, 1009, 1048, 1050, 1057, 1078, 1146, 1197, 1213, 1227, 1242, 1326, 1332, 1363, 1419, 1462, 1492, 1496, 1531, 1617, 1648, 1659, 1685, 1824, 2958, 3057, 3119, 3179, 3191, 3204, 3211, 3225, 3556, 3984

Rotational constants (GHZ):      0.97615    0.70088    0.46964  
Zero-point correction=                    0.178719 (Hartree/Particle)  
Thermal correction to Energy=            0.191795  
Thermal correction to Enthalpy=         0.192739  
Thermal correction to Gibbs Free Energy=    0.136686  
Sum of electronic and zero-point Energies=    -649.385068  
Sum of electronic and thermal Energies=    -649.371992  
Sum of electronic and thermal Enthalpies=   -649.371048  
Sum of electronic and thermal Free Energies= -649.427101

## Complex\_sCI\_Indene1(anti)-H<sub>2</sub>O

Frequencies: 25, 48, 55, 82, 107, 163, 182, 209, 238, 258, 277, 314, 350, 429, 453, 466, 508, 515, 595, 611, 676, 749 764, 786, 862, 876, 902, 912, 989, 994, 1031, 1035, 1048, 1065, 1090, 1147, 1188, 1210, 1220, 1242, 1311, 1319, 1339, 1379, 1488, 1515, 1524, 1619, 1643, 1685, 1776, 1845, 2952, 3110, 3174, 3181, 3189, 3194, 3200, 3213, 3619, 3996

Rotational constants (GHZ):      1.30378    0.45246    0.36611  
Zero-point correction=                    0.178593 (Hartree/Particle)  
Thermal correction to Energy=            0.191954  
Thermal correction to Enthalpy=         0.192898  
Thermal correction to Gibbs Free Energy=    0.137021  
Sum of electronic and zero-point Energies=    -649.377978  
Sum of electronic and thermal Energies=    -649.364618  
Sum of electronic and thermal Enthalpies=   -649.363674  
Sum of electronic and thermal Free Energies= -649.419551

## ST\_sCI\_Indene1(syn)-H<sub>2</sub>O

Frequencies: -451, 64, 80, 93, 142, 194, 227, 240, 269, 307, 371, 422, 435, 462, 507, 540, 591, 625, 639, 676, 699, 761, 776, 797, 884, 900, 926, 952, 1005, 1045, 1048, 1055, 1070, 1094, 1148, 1189, 1214, 1222, 1235, 1316, 1319, 1327, 1335, 1379, 1458, 1494, 1507, 1526, 1574, 1618, 1636, 1643, 1832, 2400, 2943, 3131, 3184, 3190, 3192, 3205, 3207, 3213, 3923

Rotational constants (GHZ):      1.22652    0.59715    0.43647  
Zero-point correction=                    0.178749 (Hartree/Particle)

Thermal correction to Energy= 0.190092  
Thermal correction to Enthalpy= 0.191036  
Thermal correction to Gibbs Free Energy= 0.141165  
Sum of electronic and zero-point Energies= -649.362125  
Sum of electronic and thermal Energies= -649.350782  
Sum of electronic and thermal Enthalpies= -649.349838  
Sum of electronic and thermal Free Energies= -649.399709

## **ST\_sCI\_Indene1(anti)-H<sub>2</sub>O**

Frequencies: -437, 38, 64, 69, 122, 191, 230, 237, 273, 291, 382, 411, 435, 457, 500, 517, 566, 593, 638, 679, 687, 754, 779, 800, 874, 900, 921, 991, 1004, 1042, 1047, 1056, 1082, 1144, 1181, 1192, 1213, 1220, 1234, 1316, 1320, 1330, 1352, 1409, 1449, 1488, 1494, 1530, 1593, 1619, 1633, 1647, 1841, 2299, 2949, 3096, 3159, 3183, 3190, 3202, 3213, 3220, 3925

Rotational constants (GHZ): 1.28304 0.51781 0.41543  
Zero-point correction= 0.178328 (Hartree/Particle)  
Thermal correction to Energy= 0.189910  
Thermal correction to Enthalpy= 0.190854  
Thermal correction to Gibbs Free Energy= 0.139671  
Sum of electronic and zero-point Energies= -649.362987  
Sum of electronic and thermal Energies= -649.351406  
Sum of electronic and thermal Enthalpies= -649.350462  
Sum of electronic and thermal Free Energies= -649.401645

## **Product\_sCI\_Indene1(anti)-H<sub>2</sub>O**

Frequencies: 51, 62, 70, 111, 161, 194, 226, 278, 290, 309, 362, 374, 418, 441, 466, 506, 563, 614, 647, 676, 758, 781, 793, 860, 901, 920, 999, 1029, 1034, 1041, 1051, 1071, 1084, 1123, 1148, 1193, 1208, 1222, 1228, 1298, 1316, 1340, 1375, 1389, 1449, 1457, 1464, 1475, 1499, 1531, 1619, 1649, 1839, 2931, 3062, 3121, 3142, 3181, 3191, 3202, 3212, 3826, 3907

Rotational constants (GHZ): 1.17262 0.57903 0.44913  
Zero-point correction= 0.181669 (Hartree/Particle)  
Thermal correction to Energy= 0.193800  
Thermal correction to Enthalpy= 0.194744  
Thermal correction to Gibbs Free Energy= 0.142716  
Sum of electronic and zero-point Energies= -649.431719  
Sum of electronic and thermal Energies= -649.419588  
Sum of electronic and thermal Enthalpies= -649.418644

Sum of electronic and thermal Free Energies= -649.470672

## Indne 2

### ST\_Indene2000\_cyclic\_sCI-Indene2

Frequencies: -423, 105, 115, 217, 251, 334, 388, 433, 447, 473, 505, 555, 592, 619, 641, 673, 749, 777, 824, 883, 897, 918, 954, 986, 1023, 1043, 1059, 1113, 1135, 1184, 1187, 1207, 1225, 1250, 1258, 1289, 1304, 1335, 1353, 1412, 1483, 1506, 1514, 1522, 1625, 1651, 2954, 3063, 3110, 3170, 3181, 3188, 3198, 3211

Rotational constants (GHZ): 2.26818 0.70190 0.57717

Zero-point correction= 0.152849 (Hartree/Particle)

Thermal correction to Energy= 0.161409

Thermal correction to Enthalpy= 0.162354

Thermal correction to Gibbs Free Energy= 0.119045

Sum of electronic and zero-point Energies= -572.917895

Sum of electronic and thermal Energies= -572.909335

Sum of electronic and thermal Enthalpies= -572.908391

Sum of electronic and thermal Free Energies= -572.951699

### sCI\_Indene2\_(syn)

Frequencies: 47, 53, 101, 154, 166, 239, 287, 318, 413, 421, 444, 516, 527, 581, 612, 703, 761, 784, 795, 860, 873, 909, 937, 984, 1008, 1040, 1040, 1061, 1069, 1124, 1188, 1203, 1206, 1242, 1295, 1322, 1337, 1474, 1485, 1491, 1503, 1576, 1598, 1634, 1643, 1886, 2918, 3055, 3140, 3186, 3199, 3212, 3214, 3259

Rotational constants (GHZ): 1.13572 0.75859 0.48350

Zero-point correction= 0.152854 (Hartree/Particle)

Thermal correction to Energy= 0.163207

Thermal correction to Enthalpy= 0.164151

Thermal correction to Gibbs Free Energy= 0.115622

Sum of electronic and zero-point Energies= -572.967034

Sum of electronic and thermal Energies= -572.956682

Sum of electronic and thermal Enthalpies= -572.955737

Sum of electronic and thermal Free Energies= -573.004266

### sCI\_Indene2 (anti)

Frequencies: 48, 79, 89, 143, 161, 175, 256, 321, 341, 401, 479, 486, 502, 536, 598, 647, 757, 785, 795, 849, 897, 905, 993, 1004, 1005, 1033, 1039, 1066, 1075, 1133, 1187, 1199, 1215, 1262, 1300, 1318, 1332, 1421, 1460, 1493, 1519, 1562, 1604, 1629, 1651, 1883, 2883, 3072, 3137, 3172, 3188, 3198, 3208, 3218

Rotational constants (GHZ): 0.97998 0.79689 0.46497

Zero-point correction= 0.151979 (Hartree/Particle)

Thermal correction to Energy= 0.162617  
Thermal correction to Enthalpy= 0.163562  
Thermal correction to Gibbs Free Energy= 0.114515  
Sum of electronic and zero-point Energies= -572.967884  
Sum of electronic and thermal Energies= -572.957245  
Sum of electronic and thermal Enthalpies= -572.956301  
Sum of electronic and thermal Free Energies= -573.005348

## SO<sub>2</sub>\_sCI-Indene2 (SOZ)

Frequencies: 38, 45, 84, 90, 121, 141, 179, 235, 267, 297, 339, 364, 445, 452, 479, 488, 533, 544, 594, 653, 666, 711, 760, 778, 788, 794, 859, 892, 926, 939, 1000, 1019, 1034, 1039, 1072, 1078, 1107, 1161, 1187, 1208, 1220, 1270, 1300, 1302, 1323, 1343, 1401, 1458, 1470, 1491, 1512, 1540, 1628, 1651, 1874, 3004, 3075, 3082, 3133, 3181, 3193, 3205, 3217

Rotational constants (GHZ): 0.79231 0.41663 0.28847  
Zero-point correction= 0.164670 (Hartree/Particle)  
Thermal correction to Energy= 0.177648  
Thermal correction to Enthalpy= 0.178592  
Thermal correction to Gibbs Free Energy= 0.123514  
Sum of electronic and zero-point Energies= -1121.523743  
Sum of electronic and thermal Energies= -1121.510765  
Sum of electronic and thermal Enthalpies= -1121.509820  
Sum of electronic and thermal Free Energies= -1121.564899

## ST1\_Indene2\_aldehyde\_SO<sub>3</sub>

Frequencies: -623, 51, 55, 76, 110, 119, 164, 176, 217, 242, 327, 344, 370, 441, 467, 486, 525, 541, 555, 586, 595, 637, 709, 777, 785, 811, 844, 885, 920, 929, 1003, 1028, 1037, 1040, 1077, 1084, 1122, 1138, 1194, 1205, 1215, 1227, 1248, 1304, 1326, 1338, 1350, 1411, 1477, 1495, 1536, 1545, 1628, 1654, 1876, 2989, 3028, 3087, 3141, 3177, 3191, 3203, 3217

Rotational constants (GHZ): 0.77475 0.42680 0.30603  
Zero-point correction= 0.162521 (Hartree/Particle)  
Thermal correction to Energy= 0.175322  
Thermal correction to Enthalpy= 0.176266  
Thermal correction to Gibbs Free Energy= 0.121955  
Sum of electronic and zero-point Energies= -1121.490407  
Sum of electronic and thermal Energies= -1121.477605  
Sum of electronic and thermal Enthalpies= -1121.476661  
Sum of electronic and thermal Free Energies= -1121.530972

## ST2\_ Indene2\_organic acid\_SO2

Frequencies: -925, 41, 45, 58, 103, 114, 175, 182, 208, 239, 276, 313, 344, 411, 439, 467, 474, 521, 532, 552, 577, 598, 661, 746, 775, 788, 823, 842, 875, 897, 922, 1002, 1031, 1039, 1043, 1071, 1074, 1108, 1162, 1188, 1211, 1221, 1304, 1309, 1322, 1329, 1340, 1366, 1489, 1494, 1500, 1526, 1622, 1642, 1873, 2505, 2994, 3082, 3142, 3181, 3193, 3204, 3217

Rotational constants (GHZ):      0.75892    0.42763    0.30669  
Zero-point correction=                    0.158983 (Hartree/Particle)  
Thermal correction to Energy=            0.172292  
Thermal correction to Enthalpy=           0.173236  
Thermal correction to Gibbs Free Energy=    0.117518  
Sum of electronic and zero-point Energies=    -1121.484559  
Sum of electronic and thermal Energies=    -1121.471249  
Sum of electronic and thermal Enthalpies=    -1121.470305  
Sum of electronic and thermal Free Energies=   -1121.526024

## ST3\_ Indene2\_ester\_SO2

Frequencies: -536, 34, 64, 79, 87, 117, 148, 182, 230, 250, 318, 325, 388, 415, 437, 478, 481, 507, 547, 589, 600, 657, 716, 741, 768, 792, 836, 895, 906, 985, 1000, 1027, 1034, 1047, 1062, 1075, 1149, 1156, 1194, 1210, 1226, 1260, 1276, 1295, 1307, 1334, 1342, 1443, 1449, 1475, 1511, 1528, 1598, 1627, 1869, 3027, 3076, 3094, 3156, 3188, 3200, 3206, 3220

Rotational constants (GHZ):      0.85197    0.41194    0.30867  
Zero-point correction=                    0.162285 (Hartree/Particle)  
Thermal correction to Energy=            0.175261  
Thermal correction to Enthalpy=           0.176205  
Thermal correction to Gibbs Free Energy=    0.121290  
Sum of electronic and zero-point Energies=    -1121.484757  
Sum of electronic and thermal Energies=    -1121.471781  
Sum of electronic and thermal Enthalpies=    -1121.470837  
Sum of electronic and thermal Free Energies=   -1121.525752

## Aldehyde\_Indene2 P1

Frequencies: 43, 78, 116, 169, 248, 258, 312, 371, 452, 469, 496, 543, 603, 651, 759, 785, 808, 828, 880, 928, 1015, 1028, 1050, 1060, 1067, 1073, 1127, 1185, 1198, 1213, 1238, 1294, 1312, 1331, 1463, 1491, 1496, 1523, 1556, 1621, 1646, 1838, 1880, 2923, 2972, 3076, 3139, 3186, 3196, 3206, 3219

Rotational constants (GHZ):      1.42050    0.92337    0.60068  
Zero-point correction=                    0.149039 (Hartree/Particle)  
Thermal correction to Energy=            0.158509

Thermal correction to Enthalpy= 0.159453  
Thermal correction to Gibbs Free Energy= 0.113205  
Sum of electronic and zero-point Energies= -497.902728  
Sum of electronic and thermal Energies= -497.893258  
Sum of electronic and thermal Enthalpies= -497.892313  
Sum of electronic and thermal Free Energies= -497.938562

## Organic acid\_Indene2 P2

Frequencies: 44, 54, 102, 149, 252, 276, 296, 368, 418, 441, 453, 534, 553, 624, 641, 655, 742, 762, 781, 829, 839, 877, 921, 1009, 1034, 1037, 1062, 1083, 1126, 1152, 1196, 1219, 1224, 1234, 1304, 1313, 1347, 1398, 1445, 1493, 1532, 1565, 1617, 1651, 18533, 1877, 2945, 3099, 3147, 3180, 3195, 3207, 3229, 3846

Rotational constants (GHZ): 1.22434 0.84168 0.52701  
Zero-point correction= 0.155447 (Hartree/Particle)  
Thermal correction to Energy= 0.165504  
Thermal correction to Enthalpy= 0.166448  
Thermal correction to Gibbs Free Energy= 0.118679  
Sum of electronic and zero-point Energies= -573.151284  
Sum of electronic and thermal Energies= -573.141227  
Sum of electronic and thermal Enthalpies= -573.140282  
Sum of electronic and thermal Free Energies= -573.188052

## Ester\_Indene2 P3

Frequencies:43, 73, 100, 126, 139, 182, 275, 296, 342, 421, 468, 494, 525, 577, 605, 674, 759, 789, 799, 859, 904, 911, 993, 1021, 1032, 1068, 1069, 1076, 1132, 1173, 1181, 1207, 1216, 1281, 1303, 1311, 1337, 1441, 1476, 1484, 1493, 1534, 1631, 1649, 1874, 1908, 2959, 3038, 3066, 3141, 3188, 3194, 3203, 3214

Rotational constants (GHZ): 0.98029 0.85281 0.48600  
Zero-point correction= 0.153227 (Hartree/Particle)  
Thermal correction to Energy= 0.163820  
Thermal correction to Enthalpy= 0.164764  
Thermal correction to Gibbs Free Energy= 0.115641  
Sum of electronic and zero-point Energies= -573.127834  
Sum of electronic and thermal Energies= -573.117241  
Sum of electronic and thermal Enthalpies= -573.116297  
Sum of electronic and thermal Free Energies= -573.165419

## Complex\_sCI\_Indene2(syn)-H<sub>2</sub>O

Frequencies: 29, 46, 67, 92, 129, 161, 175, 194, 195, 233, 278, 315, 404, 415, 445, 505, 512, 538, 575, 606, 670, 704, 765, 785, 802, 860, 872, 919, 950, 960, 1022, 1026, 1050, 1062, 1069, 1123, 1197, 1202, 1214, 1245, 1300, 1326, 1339, 1454, 1469, 1492, 1511, 1531, 1606, 1632, 1649, 1711, 1884, 2916, 3066, 3136, 3189, 3203, 3214, 3219, 3255, 3700, 3986

Rotational constants (GHZ): 0.98437 0.54673 0.41428

Zero-point correction= 0.178163 (Hartree/Particle)

Thermal correction to Energy= 0.191561

Thermal correction to Enthalpy= 0.192506

Thermal correction to Gibbs Free Energy= 0.136877

Sum of electronic and zero-point Energies= -649.374009

Sum of electronic and thermal Energies= -649.360611

Sum of electronic and thermal Enthalpies= -649.359667

Sum of electronic and thermal Free Energies= -649.415295

## Complex\_sCI\_Indene2(anti)-H<sub>2</sub>O

Frequencies: 25, 48, 55, 82, 107, 163, 182, 209, 238, 258, 277, 314, 350, 429, 453, 466, 508, 515, 595, 611, 676, 749, 764, 786, 862, 876, 902, 912, 989, 994, 1031, 1035, 1048, 1065, 1090, 1147, 1188, 1210, 1220, 1242, 1311, 1319, 1339, 1379, 1446, 1488, 1515, 1524, 1619, 1643, 1685, 1776, 1845, 2952, 3110, 3174, 3181, 3189, 3194, 3200, 3213, 3619, 3996

Rotational constants (GHZ): 1.30378 0.45246 0.36611

Zero-point correction= 0.178593 (Hartree/Particle)

Thermal correction to Energy= 0.191954

Thermal correction to Enthalpy= 0.192898

Thermal correction to Gibbs Free Energy= 0.137021

Sum of electronic and zero-point Energies= -649.377978

Sum of electronic and thermal Energies= -649.364618

Sum of electronic and thermal Enthalpies= -649.363674

Sum of electronic and thermal Free Energies= -649.419551

## ST\_sCI\_Indene2(syn)-H<sub>2</sub>O

Frequencies: -601, 43, 65, 92, 109, 140, 181, 247, 294, 321, 343, 396, 440, 470, 521, 536, 555, 602, 634, 684, 725, 768, 792, 797, 861, 874, 913, 937, 1020, 1036, 1049, 1066, 1067, 1074, 1119, 1137, 1187, 1205, 1220, 1242, 1310, 1324, 1336, 1418, 1442, 1487, 1513, 1541, 1560, 1617, 1642, 1653, 1881, 2122, 2917, 3070, 3135, 3180, 3184, 3196, 3206, 3233, 3924

Rotational constants (GHZ): 0.99789 0.63050 0.44051

Zero-point correction= 0.176916 (Hartree/Particle)

Thermal correction to Energy= 0.188582

Thermal correction to Enthalpy= 0.189526

Thermal correction to Gibbs Free Energy= 0.138255



Sum of electronic and zero-point Energies= -649.351055  
Sum of electronic and thermal Energies= -649.339389  
Sum of electronic and thermal Enthalpies= -649.338445  
Sum of electronic and thermal Free Energies= -649.389716

## ST\_sCI\_Indene2(anti)-H<sub>2</sub>O

Frequencies:-437, 38, 64, 69, 122, 191, 230, 237, 273, 291, 382, 411, 435, 457, 500, 517, 566, 593, 638, 679, 687, 754, 779, 800, 874, 900, 921, 991, 1004, 1042, 1047, 1056, 1082, 1144, 1181, 1192, 1213, 1220, 1234, 1316, 1320, 1330, 1352, 1409, 1449, 1488, 1494, 1530, 1593, 1619, 1633, 1647, 1841, 2299, 2949, 3096, 3159, 3183, 3190, 3202, 3213, 3220, 3925

Rotational constants (GHZ): 1.28304 0.51781 0.41543  
Zero-point correction= 0.178328 (Hartree/Particle)  
Thermal correction to Energy= 0.189910  
Thermal correction to Enthalpy= 0.190854  
Thermal correction to Gibbs Free Energy= 0.139671  
Sum of electronic and zero-point Energies= -649.362987  
Sum of electronic and thermal Energies= -649.351406  
Sum of electronic and thermal Enthalpies= -649.350462  
Sum of electronic and thermal Free Energies= -649.401645

## Product\_sCI\_Indene2\_H<sub>2</sub>O

Frequencies: 90, 104, 116, 152, 174, 189, 246, 257, 303, 323, 357, 410, 431, 476, 494, 515, 572, 651, 667, 696, 758, 783, 798, 849, 886, 911, 955, 995, 1017, 1037, 1048, 1070, 1074, 1112, 1140, 1185, 1208, 1228, 1250, 1300, 1310, 1338, 1368, 1427, 1449, 1451, 1485, 1497, 1533, 1619, 1650, 1653, 1868, 2944, 3026, 3086, 3106, 3179, 3191, 3202, 3218, 3821

Rotational constants (GHZ): 0.98895 0.71963 0.48990  
Zero-point correction= 0.182664 (Hartree/Particle)  
Thermal correction to Energy= 0.194297  
Thermal correction to Enthalpy= 0.195241  
Thermal correction to Gibbs Free Energy= 0.145377  
Sum of electronic and zero-point Energies= -649.424054  
Sum of electronic and thermal Energies= -649.412421  
Sum of electronic and thermal Enthalpies= -649.411477  
Sum of electronic and thermal Free Energies= -649.461341
